# Supplementary material for: Accurately measuring willingness to pay for consumer goods: a meta-analysis of the hypothetical bias
Source: Springer Nature journal article supplement (doi:10.1007/s11747-019-00666-6), 2019-06-07
Supplement: MOESM1 [file 16783342]

## **Web Appendix**

Accurately measuring willingness to pay for consumer goods:

A meta-analysis of the hypothetical bias

### **Web Appendix A: Related meta-analyses**

Three related meta-analyses focus on measuring WTP for public goods (Carson et al. 1996; List and Gallet 2001; Murphy et al. 2005). As this evidence shows, measuring WTP is of interest for not just marketing researchers and managers but also for economists and policy makers. Public goods are those for which “each individual’s consumption of such a good leads to no subtraction from any other individual’s consumption of that good” (Samuelson 1954, p. 387), such as public roads and national defense. The government provides most public goods, such that they generally are not accessed through markets. Instead, a command mechanism (i.e., one person or a small group determines the price and amount) or voting system defines the status of public goods (Varian 2010, p. 708). In this sense, the price-setting mechanisms and consumer perceptions of prices are vastly different between public and private goods.

The extant meta-analyses offer some interesting insights about public goods specifically. Carson et al.’s (1996) analysis of studies that measure WTP for public goods indicates an average underestimation of RWTP by 11%. In contrast, List and Gallet (2001) indicate a 300% overestimation of RWTP. They additionally include studies that measure WTP for private goods, such that they identify a 47% lower overestimation for private goods, compared with that for public goods. Murphy et al. (2005) also include both public and private goods and report an RWTP overestimation of 35% on average. In detailing influential variables, Murphy et al. (2005) use RWTP as a dependent variable in the regression model, instead of an effect size based on the difference between HWTP and RWTP. In this sense, their analysis does not provide insights into the potential moderators of the hypothetical bias.

Our meta-analysis differs from these previous contributions in four important points. First, we purposefully focus on private goods only, to ensure an alignment with the very meaning of “marketing,” for which market mechanisms are central. Marketing literature and theory includes public goods only in limited domains, such as in nonprofit marketing (Hunt 1976) or the

sharing economy (Lamberton and Rose 2012). The unique channels for distributing public goods and the resulting implications for pricing mechanisms and consumer responses mean that evidence of a hypothetical bias for public goods cannot be applied to private goods (List and Gallet 2001). In turn, marketing researchers have largely ignored the results from the existing meta-analyses,<sup>1</sup> despite the relevance of WTP for them. Second, we prioritize the comparison of direct and indirect methods for measuring WTP in our meta-analysis. Although both direct and indirect methods are popular for studies of private goods, direct methods typically are the only source of WTP measures for public goods (e.g., referendum, Smith auction). Third, we examine several novel factors that might affect the hypothetical bias for private goods (Hofstetter et al. 2013; Sichtmann et al. 2011). No existing studies have considered such private good-specific moderators. Fourth, our meta-analysis includes many recent empirical studies, published after the previous meta-analyses (which appeared in 1996, 2001, and 2005).

---

<sup>1</sup>Each of these studies has been cited more than 800 times (Google Scholar as of November 8, 2018: Carson et al. 829; List and Gallet 855; Murphy et al. 830), yet together, they have been cited only 5 times in top marketing journals (*Journal of Marketing*, *Journal of Marketing Research*, *Journal of Consumer Research*, *Marketing Science*, and *Journal of the Academy of Marketing Science*), highlighting their limited implications for marketing.

## Web Appendix B: Meta-analytic calculations of the covariances between ESs

For independent ESs from different studies, the covariances in  $V_i$  have values of zero. An ES's variance in a study using a between-subject design is given by

$$\hat{\sigma}_{between}^2(ES) = \frac{(SD_{RWTP})^2}{N_{RWTP}\mu_{RWTP}^2} + \frac{(SD_{HWTP})^2}{N_{HWTP}\mu_{HWTP}^2},$$

where  $SD$  and  $N$  are the standard deviation and sample size, respectively, of the treatment and control groups (Lajeunesse 2011). If HWTP and RWTP are measured with the same sample, the sampling variance is given by

$$\hat{\sigma}_{within}^2(ES) = \frac{(SD_{RWTP})^2}{N_{RWTP}\mu_{RWTP}^2} + \frac{(SD_{HWTP})^2}{N_{HWTP}\mu_{HWTP}^2} - \frac{2rSD_{RWTP}SD_{HWTP}}{\mu_{RWTP}\mu_{HWTP}\sqrt{N_{RWTP}N_{HWTP}}},$$

where  $r$  is the correlation of  $\mu_{RWTP}$  and  $\mu_{HWTP}$  (Lajeunesse 2011). To control for multiple-treatment studies (Gleser and Olkin 2009), we compute their covariances in  $V$  by

$$cov^{MT}(ES^A, ES^B) = \frac{(SD_{RWTP})^2}{N_{RWTP}\mu_{RWTP}^2}.$$

However, if the different treatments themselves are of special interest and explicitly modeled as moderators in the meta-analysis, their ESs should be treated independently (Lajeunesse 2011). Consequently, we do not model correlations between direct and indirect measures of HWTP that share a common RWTP, for example. To account for multiple-endpoint studies (Gleser and Olkin 2009), we compute their covariances in  $V_i$  by

$$cov^{ME}(ES^A, ES^B) = \frac{r_{RWTP}SD_{RWTP}^A SD_{RWTP}^B}{\mu_{RWTP}^A \mu_{RWTP}^B \sqrt{N_{RWTP}^A N_{RWTP}^B}} + \frac{r_{HWTP}SD_{HWTP}^A SD_{HWTP}^B}{\mu_{HWTP}^A \mu_{HWTP}^B \sqrt{N_{HWTP}^A N_{HWTP}^B}},$$

where  $r_{RWTP/HWTP}$  is the correlation between the mean WTP for product A and product B (Lajeunesse 2011). Thus,  $V$  could have the following exemplary form for five ESs from three studies

$V$

$$= \begin{bmatrix} \hat{\sigma}^2(ES^A) & cov^{MT}(ES^A, ES^B) & 0 & 0 & 0 \\ cov^{MT}(ES^A, ES^B) & \hat{\sigma}^2(ES^B) & 0 & 0 & 0 \\ 0 & 0 & \hat{\sigma}^2(ES^C) & 0 & 0 \\ 0 & 0 & 0 & \hat{\sigma}^2(ES^D) & cov^{ME}(ES^D, ES^E) \\ 0 & 0 & 0 & cov^{ME}(ES^D, ES^E) & \hat{\sigma}^2(ES^E) \end{bmatrix},$$

where ESs A and B are from a multiple-treatment study, ES C is from a study reporting only one ES, and ESs D and E are from a multiple-endpoint study.

**Web Appendix C: Funnel plot**

Figure WA1: Funnel plot including all ESs

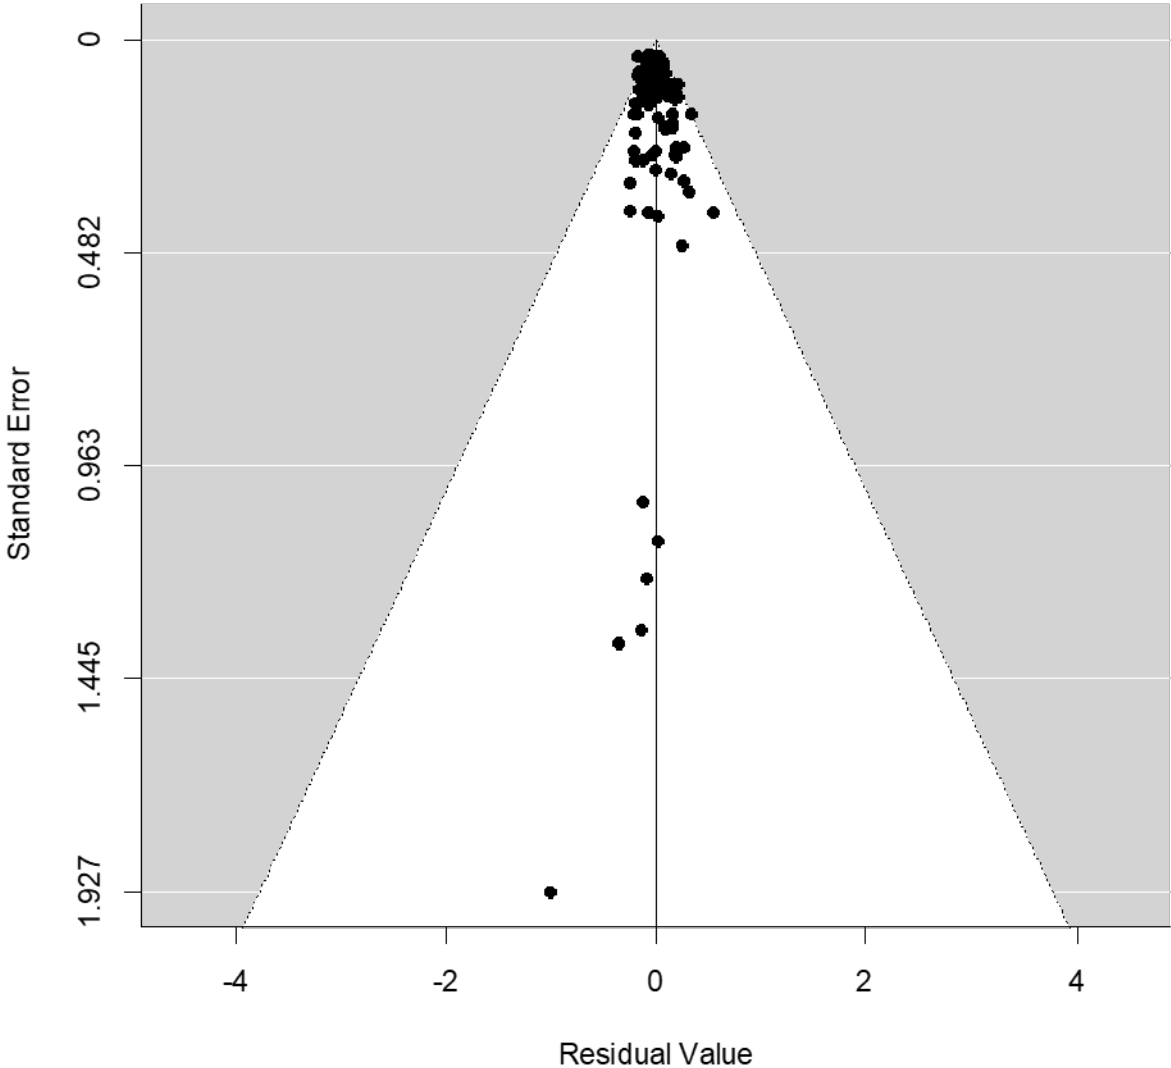

**Web Appendix D: Boxplot of ESs**

Figure WA2: Boxplot

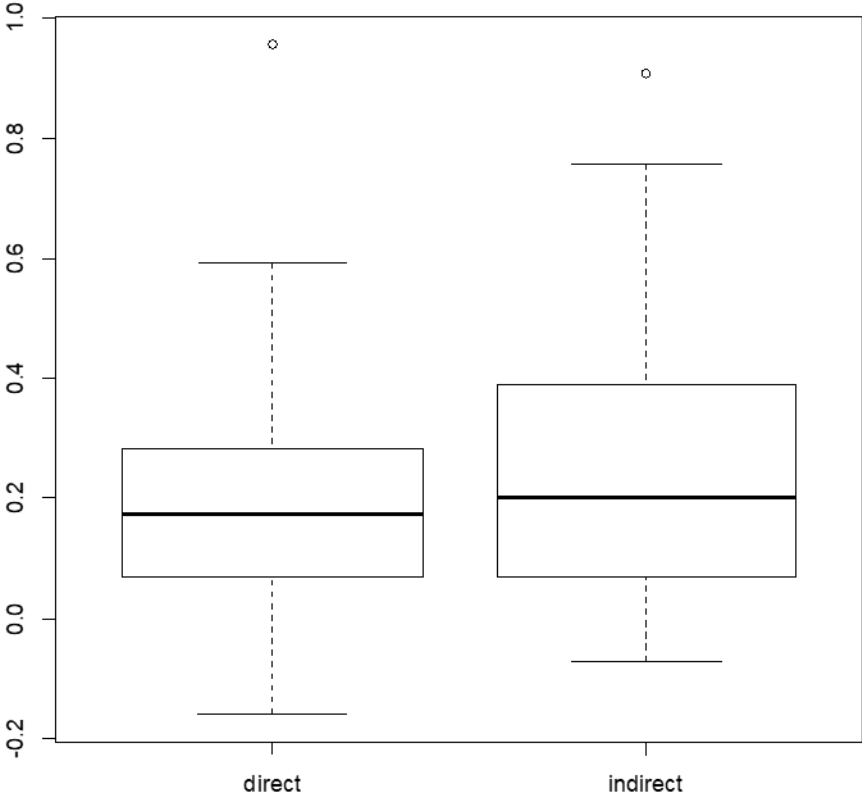

## Web Appendix E: Table of correlations

Table WA1: Table of correlations

|   | A     | B     | C     | D     | E     | F     | G     | H     | I     | J     | K     | L     | M     | N     | O     | P     | Q     | R     | S     | T     | U     | V     | W     | X    | Y     |
|---|-------|-------|-------|-------|-------|-------|-------|-------|-------|-------|-------|-------|-------|-------|-------|-------|-------|-------|-------|-------|-------|-------|-------|------|-------|
| B | 0.34  |       |       |       |       |       |       |       |       |       |       |       |       |       |       |       |       |       |       |       |       |       |       |      |       |
| C | -0.32 | 0.15  |       |       |       |       |       |       |       |       |       |       |       |       |       |       |       |       |       |       |       |       |       |      |       |
| D | 0.32  | -0.10 | -0.50 |       |       |       |       |       |       |       |       |       |       |       |       |       |       |       |       |       |       |       |       |      |       |
| E | 0.29  | -0.11 | -0.52 | 0.29  |       |       |       |       |       |       |       |       |       |       |       |       |       |       |       |       |       |       |       |      |       |
| F | -0.31 | -0.17 | 0.20  | -0.09 | -0.49 |       |       |       |       |       |       |       |       |       |       |       |       |       |       |       |       |       |       |      |       |
| G | -0.07 | 0.33  | 0.28  | -0.16 | -0.12 | 0.07  |       |       |       |       |       |       |       |       |       |       |       |       |       |       |       |       |       |      |       |
| H | 0.20  | -0.05 | -0.45 | 0.22  | 0.67  | -0.26 | -0.23 |       |       |       |       |       |       |       |       |       |       |       |       |       |       |       |       |      |       |
| I | -0.11 | -0.04 | 0.11  | -0.05 | -0.18 | 0.32  | -0.14 | -0.13 |       |       |       |       |       |       |       |       |       |       |       |       |       |       |       |      |       |
| J | -0.08 | -0.12 | 0.15  | -0.10 | -0.20 | 0.15  | 0.06  | -0.27 | -0.08 |       |       |       |       |       |       |       |       |       |       |       |       |       |       |      |       |
| K | -0.24 | 0.06  | 0.28  | -0.18 | -0.50 | 0.43  | -0.04 | -0.40 | 0.26  | 0.10  |       |       |       |       |       |       |       |       |       |       |       |       |       |      |       |
| L | 0.10  | 0.22  | 0.11  | -0.07 | -0.19 | 0.00  | 0.33  | -0.50 | -0.14 | -0.19 | -0.05 |       |       |       |       |       |       |       |       |       |       |       |       |      |       |
| M | 0.23  | 0.37  | -0.07 | -0.10 | -0.19 | -0.04 | 0.17  | -0.13 | -0.04 | 0.13  | 0.16  | 0.19  |       |       |       |       |       |       |       |       |       |       |       |      |       |
| N | -0.10 | -0.25 | -0.17 | 0.04  | 0.17  | -0.04 | 0.06  | 0.27  | -0.26 | -0.39 | -0.29 | 0.26  | -0.15 |       |       |       |       |       |       |       |       |       |       |      |       |
| O | -0.14 | -0.27 | -0.14 | 0.03  | 0.16  | -0.07 | 0.14  | 0.23  | -0.27 | -0.32 | -0.26 | 0.19  | -0.17 | 0.91  |       |       |       |       |       |       |       |       |       |      |       |
| P | 0.25  | 0.21  | 0.04  | 0.08  | -0.06 | -0.01 | 0.36  | -0.10 | -0.10 | 0.05  | -0.29 | 0.24  | -0.10 | -0.15 | -0.14 |       |       |       |       |       |       |       |       |      |       |
| Q | 0.27  | 0.25  | 0.00  | 0.11  | 0.01  | -0.01 | 0.35  | -0.05 | -0.09 | 0.09  | -0.37 | 0.23  | -0.08 | -0.14 | -0.17 | 0.91  |       |       |       |       |       |       |       |      |       |
| R | -0.14 | -0.29 | -0.25 | 0.11  | 0.31  | 0.07  | -0.01 | 0.42  | -0.21 | -0.12 | -0.13 | -0.20 | -0.12 | 0.59  | 0.55  | -0.29 | -0.22 |       |       |       |       |       |       |      |       |
| S | -0.13 | 0.00  | 0.14  | -0.26 | -0.06 | 0.09  | -0.08 | 0.17  | 0.16  | 0.03  | 0.26  | -0.42 | -0.22 | -0.04 | -0.03 | 0.02  | 0.03  | -0.03 |       |       |       |       |       |      |       |
| T | -0.03 | -0.10 | 0.11  | -0.12 | -0.18 | 0.17  | 0.09  | -0.17 | -0.05 | 0.16  | -0.03 | 0.15  | 0.28  | 0.04  | 0.14  | -0.07 | -0.11 | -0.03 | -0.40 |       |       |       |       |      |       |
| U | 0.01  | -0.14 | -0.03 | 0.06  | 0.13  | -0.18 | -0.07 | -0.27 | -0.09 | -0.20 | -0.22 | 0.50  | -0.15 | 0.09  | 0.07  | 0.04  | 0.08  | -0.05 | -0.54 | -0.17 |       |       |       |      |       |
| V | -0.29 | -0.18 | 0.18  | -0.17 | -0.25 | 0.24  | -0.17 | -0.16 | 0.32  | 0.06  | 0.26  | 0.03  | 0.08  | -0.11 | -0.07 | -0.22 | -0.22 | -0.29 | -0.09 | 0.26  | 0.09  |       |       |      |       |
| W | -0.11 | 0.14  | 0.03  | -0.08 | 0.05  | -0.02 | -0.07 | 0.17  | 0.09  | -0.48 | 0.03  | 0.08  | -0.01 | 0.36  | 0.39  | -0.40 | -0.46 | 0.09  | 0.01  | 0.03  | -0.05 | 0.30  |       |      |       |
| X | 0.19  | -0.06 | -0.33 | 0.24  | 0.50  | -0.38 | 0.10  | 0.36  | -0.24 | -0.02 | -0.50 | -0.21 | -0.34 | 0.17  | 0.15  | 0.34  | 0.33  | 0.28  | 0.20  | -0.40 | -0.05 | -0.62 | -0.25 |      |       |
| Y | -0.20 | -0.06 | 0.16  | -0.13 | 0.12  | -0.05 | 0.27  | -0.14 | 0.10  | -0.14 | -0.08 | 0.13  | -0.09 | 0.09  | 0.16  | -0.20 | -0.23 | 0.05  | -0.03 | -0.03 | 0.20  | 0.02  | 0.38  | 0.16 |       |
| Z | 0.21  | 0.33  | 0.15  | 0.02  | 0.01  | -0.28 | 0.24  | -0.02 | -0.13 | -0.03 | -0.19 | 0.11  | 0.00  | -0.16 | -0.21 | 0.56  | 0.53  | -0.38 | 0.03  | -0.16 | -0.02 | -0.26 | -0.41 | 0.30 | -0.34 |

A = Type of measurement HWTP; B = Type of measurement RWTP; C = Incentive compatible; D = Value; E = Product type (shopping); F = Product type (specialty); G = Innovation; H = Product/service; I = Variance ES; J = Type of subject design; K = Opportunity to test; L = Participation fee; M = Initial balance; N = Type of experiment HWTP; O = Type of experiment RWTP; P = Offline/online HWTP; Q = Offline/online RWTP; R = Student sample; S = Introduction of method for RWTP (explanation); T = Introduction of method for RWTP (training); U = Introduction of method for RWTP (not mentioned); V = Region; W = Peer reviewed; X = Discipline; Y = Citations; Z = Year

## Web Appendix F: Results from robustness checks

Table WA2: Results of robustness checks

|                                 |                                        | Main models   |                  |               | Robustness checks |               |               |               |               |               |               |  |
|---------------------------------|----------------------------------------|---------------|------------------|---------------|-------------------|---------------|---------------|---------------|---------------|---------------|---------------|--|
|                                 |                                        | Full model    | Reduced model    | Model 1       | Model 2           | Model 3       | Model 4       | Model 5       | Model 6       | Model 7       | Model 8       |  |
| <b>ESs</b>                      | Excl. outliers                         | ✓             | ✓                | ✓             |                   |               | ✓             | ✓             | ✓             |               |               |  |
| <b>Moderators</b>               | Excl. moderators exceeding GVIF cutoff | ✓             | ✓                |               |                   | ✓             | ✓             | ✓             |               |               | ✓             |  |
| <b>Methodology</b>              | Dependent ESs are modeled explicitly   | ✓             | ✓                | ✓             | ✓                 | ✓             |               |               |               |               |               |  |
| <b>Type of measurement HWTP</b> | $\beta$                                | 0.1027        | 0.0905           | 0.0991        | 0.1039            | 0.1080        | 0.0811        | 0.0910        | 0.0731        | 0.0784        | 0.0861        |  |
|                                 | p-value                                | <b>0.0110</b> | <b>0.0177</b>    | <b>0.0108</b> | <b>0.0081</b>     | <b>0.0078</b> | <b>0.0350</b> | <b>0.0173</b> | <b>0.0399</b> | <b>0.0304</b> | <b>0.0264</b> |  |
| <b>Value</b>                    | $\beta$                                | 0.0002        |                  | 0.0002        | 0.0002            | 0.0002        | 0.0003        |               | 0.0003        | 0.0003        | 0.0003        |  |
|                                 | p-value                                | <b>0.0656</b> |                  | <b>0.0602</b> | <b>0.0641</b>     | <b>0.0688</b> | <b>0.0141</b> |               | <b>0.0079</b> | <b>0.0100</b> | <b>0.0157</b> |  |
| <b>Product type (specialty)</b> | $\beta$                                | 0.1615        | 0.1624           | 0.1195        | 0.1225            | 0.1603        | 0.1527        | 0.1563        | 0.1104        | 0.1126        | 0.1514        |  |
|                                 | p-value                                | <b>0.0007</b> | <b>&lt;.0001</b> | <b>0.0254</b> | <b>0.0228</b>     | <b>0.0008</b> | <b>0.0012</b> | <b>0.0001</b> | <b>0.0347</b> | <b>0.0326</b> | <b>0.0014</b> |  |
| <b>Innovation</b>               | B                                      | -0.0004       |                  | 0.0199        | 0.0267            | 0.0037        | 0.0041        |               | 0.0199        | 0.0268        | 0.0077        |  |
|                                 | p-value                                | 0.9944        |                  | 0.7072        | 0.6164            | 0.9414        | 0.9360        |               | 0.7052        | 0.6143        | 0.8809        |  |
| <b>Type of subject design</b>   | B                                      | 0.0878        |                  | 0.1797        | 0.1656            | 0.0854        | 0.0968        |               | 0.1782        | 0.1658        | 0.0936        |  |
|                                 | p-value                                | <b>0.0455</b> |                  | <b>0.0022</b> | <b>0.0050</b>     | <b>0.0527</b> | <b>0.0300</b> |               | <b>0.0014</b> | <b>0.0032</b> | <b>0.0367</b> |  |



|                            |         | Main models |               |         | Robustness checks |         |         |         |         |         |         |
|----------------------------|---------|-------------|---------------|---------|-------------------|---------|---------|---------|---------|---------|---------|
|                            |         | Full model  | Reduced model | Model 1 | Model 2           | Model 3 | Model 4 | Model 5 | Model 6 | Model 7 | Model 8 |
| <b>Opportunity to test</b> | B       | 0.0139      |               | -0.0064 | 0.0202            | 0.0268  | 0.0155  |         | -0.0090 | 0.0138  | 0.0261  |
|                            | p-value | 0.7658      |               | 0.9194  | 0.7458            | 0.5638  | 0.7307  |         | 0.8799  | 0.8161  | 0.5605  |
| <b>Participation fee</b>   | B       | 0.0522      |               | 0.0138  | 0.0195            | 0.0593  | 0.0612  |         | 0.0135  | 0.0174  | 0.0667  |
|                            | p-value | 0.2858      |               | 0.8354  | 0.7716            | 0.2266  | 0.2027  |         | 0.8338  | 0.7882  | 0.1664  |
| <b>Initial balance</b>     | B       | 0.0978      |               | 0.1138  | 0.0899            | 0.0826  | 0.1071  |         | 0.1256  | 0.1014  | 0.0918  |
|                            | p-value | 0.1896      |               | 0.1420  | 0.2409            | 0.2618  | 0.1450  |         | 0.0913  | 0.1695  | 0.2063  |

Table WA3: Full model including all moderators (Model 1 in Table WA5)

|                                                            | Estimate | EXP<br>(Estimate) | Std. Err. | p Value | Significanc<br>e |
|------------------------------------------------------------|----------|-------------------|-----------|---------|------------------|
| <b>Intercept</b>                                           | -8.5095  |                   | 11.3266   | 0.4525  |                  |
| <b>Type of measurement HWTP<br/>(indirect)</b>             | 0.0991   | 1.1042            | 0.0389    | 0.0108  | **               |
| <i>Type of measurement RWTP<br/>(indirect)</i>             | -0.0492  | 0.9520            | 0.0685    | 0.4727  |                  |
| <i>Incentive compatible<br/>(yes)</i>                      | -0.0047  | 0.9953            | 0.0617    | 0.9387  |                  |
| <b>Value</b>                                               | 0.0002   | 1.0002            | 0.0001    | 0.0602  | *                |
| <b>Product type<br/>(shopping)</b>                         | 0.0656   | 1.0678            | 0.0562    | 0.2433  |                  |
| <b>Product type<br/>(specialty)</b>                        | 0.1195   | 1.1269            | 0.0535    | 0.0254  | **               |
| <b>Innovation<br/>(yes)</b>                                | 0.0199   | 1.0201            | 0.0529    | 0.7072  |                  |
| <i>Product/service (service)</i>                           | -0.1097  | 0.8961            | 0.0853    | 0.1986  |                  |
| <i>Variance ES</i>                                         | 0.1675   | 1.1823            | 0.2528    | 0.5076  |                  |
| <b>Type of subject design<br/>(within)</b>                 | 0.1797   | 1.1969            | 0.0588    | 0.0022  | ***              |
| <b>Opportunity to test<br/>(yes)</b>                       | -0.0064  | 0.9936            | 0.0629    | 0.9194  |                  |
| <b>Participation fee<br/>(yes)</b>                         | 0.0138   | 1.0139            | 0.0667    | 0.8354  |                  |
| <b>Initial balance<br/>(yes)</b>                           | 0.1138   | 1.1205            | 0.0775    | 0.1420  |                  |
| <i>Type of experiment HWTP<br/>(lab)</i>                   | 0.1157   | 1.1227            | 0.1431    | 0.4186  |                  |
| <i>Type of experiment RWTP<br/>(lab)</i>                   | -0.1598  | 0.8523            | 0.1338    | 0.2324  |                  |
| <i>Offline/online HWTP<br/>(online)</i>                    | 0.0531   | 1.0545            | 0.1405    | 0.7055  |                  |
| <i>Offline/online RWTP<br/>(online)</i>                    | -0.1312  | 0.8770            | 0.1515    | 0.3868  |                  |
| <i>Student sample<br/>(yes)</i>                            | -0.0791  | 0.9239            | 0.0527    | 0.1331  |                  |
| <i>Introduction of method for RWTP<br/>(explanation)</i>   | 0.0728   | 1.0755            | 0.0588    | 0.2162  |                  |
| <i>Introduction of method for RWTP<br/>(training)</i>      | 0.1748   | 1.1910            | 0.0822    | 0.0334  | **               |
| <i>Introduction of method for RWTP<br/>(not mentioned)</i> | 0.1538   | 1.1663            | 0.0777    | 0.0479  | **               |
| <i>Region<br/>(North America)</i>                          | -0.1379  | 0.8712            | 0.0543    | 0.0111  | **               |
| <i>Peer reviewed<br/>(yes)</i>                             | 0.1821   | 1.1997            | 0.0766    | 0.0174  | **               |
| <i>Discipline<br/>(marketing)</i>                          | -0.0558  | 0.9457            | 0.0672    | 0.4061  |                  |
| <i>Citations</i>                                           | 0.0000   | 1.0000            | 0.0001    | 0.8703  |                  |
| <i>Year</i>                                                | 0.0042   | 1.0042            | 0.0056    | 0.4521  |                  |
| $\tau^2$                                                   | 0.0024   |                   |           |         |                  |
| AICc                                                       | 47.4233  |                   |           |         |                  |

---

Significance codes: \*\*\*  $p < 0.01$ ; \*\*  $p < 0.05$ ; \*  $p < 0.1$

---

Table WA4: Full model including all ESs and all moderators (Model 2 in TableWA5)

|                                                            | Estimate | EXP<br>(Estimate) | Std. Err. | p Value | Significanc<br>e |
|------------------------------------------------------------|----------|-------------------|-----------|---------|------------------|
| <b>Intercept</b>                                           | -5.8889  | 0.0026            | 11.3541   | 0.6040  |                  |
| <b>Type of measurement HWTP<br/>(indirect)</b>             | 0.1039   | 1.1095            | 0.0393    | 0.0081  | ***              |
| <i>Type of measurement RWTP<br/>(indirect)</i>             | -0.0474  | 0.9537            | 0.0692    | 0.4927  |                  |
| <i>Incentive compatible<br/>(yes)</i>                      | 0.0022   | 1.0022            | 0.0623    | 0.9717  |                  |
| <b>Value</b>                                               | 0.0002   | 1.0002            | 0.0001    | 0.0641  | *                |
| <b>Product type<br/>(shopping)</b>                         | 0.0671   | 1.0694            | 0.0566    | 0.2360  |                  |
| <b>Product type<br/>(specialty)</b>                        | 0.1225   | 1.1303            | 0.0538    | 0.0228  | **               |
| <b>Innovation<br/>(yes)</b>                                | 0.0267   | 1.0271            | 0.0533    | 0.6164  |                  |
| <i>Product/service (service)</i>                           | -0.0917  | 0.9124            | 0.0855    | 0.2836  |                  |
| <i>Variance ES</i>                                         | 0.2050   | 1.2275            | 0.2511    | 0.4143  |                  |
| <b>Type of subject design<br/>(within)</b>                 | 0.1656   | 1.1801            | 0.0590    | 0.0050  | ***              |
| <b>Opportunity to test<br/>(yes)</b>                       | 0.0202   | 1.0204            | 0.0623    | 0.7458  |                  |
| <b>Participation fee<br/>(yes)</b>                         | 0.0195   | 1.0197            | 0.0671    | 0.7716  |                  |
| <b>Initial balance<br/>(yes)</b>                           | 0.0899   | 1.0941            | 0.0767    | 0.2409  |                  |
| <i>Type of experiment HWTP<br/>(lab)</i>                   | 0.1354   | 1.1450            | 0.1435    | 0.3454  |                  |
| <i>Type of experiment RWTP<br/>(lab)</i>                   | -0.1772  | 0.8376            | 0.1342    | 0.1866  |                  |
| <i>Offline/online HWTP<br/>(online)</i>                    | 0.0490   | 1.0502            | 0.1410    | 0.7280  |                  |
| <i>Offline/online RWTP<br/>(online)</i>                    | -0.1195  | 0.8874            | 0.1521    | 0.4321  |                  |
| <i>Student sample<br/>(yes)</i>                            | -0.0844  | 0.9191            | 0.0532    | 0.1127  |                  |
| <i>Introduction of method for RWTP<br/>(explanation)</i>   | 0.0628   | 1.0648            | 0.0593    | 0.2892  |                  |
| <i>Introduction of method for RWTP<br/>(training)</i>      | 0.2105   | 1.2343            | 0.0816    | 0.0099  | ***              |
| <i>Introduction of method for RWTP<br/>(not mentioned)</i> | 0.1443   | 1.1552            | 0.0787    | 0.0666  | *                |
| <i>Region<br/>(North America)</i>                          | -0.1256  | 0.8820            | 0.0542    | 0.0206  | **               |
| <i>Peer reviewed<br/>(yes)</i>                             | 0.1587   | 1.1720            | 0.0767    | 0.0385  | **               |
| <i>Discipline<br/>(marketing)</i>                          | -0.0417  | 0.9592            | 0.0676    | 0.5370  |                  |
| <i>Citations</i>                                           | 0.0001   | 1.0001            | 0.0001    | 0.6775  |                  |
| <i>Year</i>                                                | 0.0029   | 1.0029            | 0.0057    | 0.6047  |                  |
| $\tau^2$                                                   | 0.0025   |                   |           |         |                  |
| AICc                                                       | 52.0891  |                   |           |         |                  |

---

Significance codes: \*\*\*  $p < 0.01$ ; \*\*  $p < 0.05$ ; \*  $p < 0.1$

---

Table WA5: Full model including all ESs and moderators with a GVIF < 2 (Model 3 in Table WA5)

|                                                        | Estimate | EXP<br>(Estimate) | Std. Err. | p Value | Significance |
|--------------------------------------------------------|----------|-------------------|-----------|---------|--------------|
| <b>Intercept</b>                                       | -2.0149  | 0.1333            | 9.5023    | 0.8321  |              |
| <b>Type of measurement HWTP (indirect)</b>             | 0.1080   | 1.1140            | 0.0406    | 0.0078  | ***          |
| <i>Type of measurement RWTP (indirect)</i>             | -0.0135  | 0.9866            | 0.0591    | 0.8188  |              |
| <i>Incentive compatible (yes)</i>                      | 0.0470   | 1.0481            | 0.0577    | 0.4150  |              |
| <b>Value</b>                                           | 0.0002   | 1.0002            | 0.0001    | 0.0688  | *            |
| <b>Product type (shopping)</b>                         | 0.0393   | 1.0401            | 0.0447    | 0.3789  |              |
| <b>Product type (specialty)</b>                        | 0.1603   | 1.1739            | 0.0479    | 0.0008  | ***          |
| <b>Innovation (yes)</b>                                | 0.0037   | 1.0037            | 0.0507    | 0.9414  |              |
| <i>Variance ES</i>                                     | 0.2098   | 1.2334            | 0.2509    | 0.4032  |              |
| <b>Type of subject design (within)</b>                 | 0.0854   | 1.0892            | 0.0441    | 0.0527  | *            |
| <b>Opportunity to test (yes)</b>                       | 0.0268   | 1.0272            | 0.0464    | 0.5638  |              |
| <b>Participation fee (yes)</b>                         | 0.0593   | 1.0611            | 0.0490    | 0.2266  |              |
| <b>Initial balance (yes)</b>                           | 0.0826   | 1.0861            | 0.0736    | 0.2618  |              |
| <i>Type of experiment RWTP (lab)</i>                   | -0.0135  | 0.9866            | 0.0471    | 0.7751  |              |
| <i>Offline/online HWTP (online)</i>                    | -0.0862  | 0.9174            | 0.0554    | 0.1202  |              |
| <i>Student sample (yes)</i>                            | -0.1063  | 0.8992            | 0.0447    | 0.0173  | **           |
| <i>Introduction of method for RWTP (explanation)</i>   | 0.0462   | 1.0473            | 0.0582    | 0.4272  |              |
| <i>Introduction of method for RWTP (training)</i>      | 0.2063   | 1.2291            | 0.0759    | 0.0065  | ***          |
| <i>Introduction of method for RWTP (not mentioned)</i> | 0.1203   | 1.1278            | 0.0787    | 0.1266  |              |
| <i>Region (North America)</i>                          | -0.0713  | 0.9312            | 0.0466    | 0.1258  |              |
| <i>Citations</i>                                       | 0.0001   | 1.0001            | 0.0001    | 0.2427  |              |
| <i>Year</i>                                            | 0.0010   | 1.0010            | 0.0047    | 0.8313  |              |
| $\tau^2$                                               | 0.0032   |                   |           |         |              |
| <b>AICc</b>                                            | 27.8365  |                   |           |         |              |

Significance codes: \*\*\*  $p < 0.01$ ; \*\*  $p < 0.05$ ; \*  $p < 0.1$

Table WA6: Interaction model with type of measurement HWTP

|                                                            | Estimate | EXP<br>(Estimate) | Std. Err. | p Value | Significance |
|------------------------------------------------------------|----------|-------------------|-----------|---------|--------------|
| <b>Intercept</b>                                           | -0.4878  | 0.6140            | 9.5328    | 0.9592  |              |
| <b>Type of measurement HWTP<br/>(indirect)</b>             | 0.0542   | 1.0557            | 0.0519    | 0.2961  |              |
| <i>Type of measurement RWTP<br/>(indirect)</i>             | 0.0122   | 1.0123            | 0.0586    | 0.8354  |              |
| <i>Incentive compatible<br/>(yes)</i>                      | 0.0239   | 1.0242            | 0.0587    | 0.6841  |              |
| <b>Value</b>                                               | 0.0002   | 1.0002            | 0.0001    | 0.0525  | *            |
| <b>Product type<br/>(shopping)</b>                         | 0.0243   | 1.0246            | 0.0449    | 0.5880  |              |
| <b>Product type<br/>(specialty)</b>                        | 0.1593   | 1.1727            | 0.0479    | 0.0009  | ***          |
| <b>Innovation<br/>(yes)</b>                                | 0.0184   | 1.0186            | 0.0528    | 0.7274  |              |
| <i>Variance ES</i>                                         | 0.1284   | 1.1370            | 0.2567    | 0.6169  |              |
| <b>Type of subject design<br/>(within)</b>                 | 0.0520   | 1.0534            | 0.0470    | 0.2686  |              |
| <b>Opportunity to test<br/>(yes)</b>                       | 0.0177   | 1.0179            | 0.0482    | 0.7133  |              |
| <b>Participation fee<br/>(yes)</b>                         | 0.0352   | 1.0358            | 0.0521    | 0.4989  |              |
| <b>Initial balance<br/>(yes)</b>                           | 0.0402   | 1.0410            | 0.0794    | 0.6132  |              |
| <i>Type of experiment RWTP<br/>(lab)</i>                   | -0.0221  | 0.9781            | 0.0487    | 0.6500  |              |
| <i>Offline/online HWTP<br/>(online)</i>                    | -0.0968  | 0.9077            | 0.0596    | 0.1042  |              |
| <i>Student sample<br/>(yes)</i>                            | -0.0964  | 0.9081            | 0.0446    | 0.0306  | **           |
| <i>Introduction of method for RWTP<br/>(explanation)</i>   | 0.0522   | 1.0536            | 0.0574    | 0.3629  |              |
| <i>Introduction of method for RWTP<br/>(training)</i>      | 0.1786   | 1.1955            | 0.0758    | 0.0185  | **           |
| <i>Introduction of method for RWTP<br/>(not mentioned)</i> | 0.1297   | 1.1385            | 0.0772    | 0.0929  | *            |
| <i>Region<br/>(North America)</i>                          | -0.0561  | 0.9454            | 0.0484    | 0.2464  |              |
| <i>Citations</i>                                           | 0.0001   | 1.0001            | 0.0001    | 0.3624  |              |
| <i>Year</i>                                                | 0.0003   | 1.0003            | 0.0047    | 0.9551  |              |
| <b>Type of measurement HWTP *</b>                          | 0.2128   | 1.2371            | 0.1081    | 0.0491  | **           |
| <b>Type of subject design</b>                              |          |                   |           |         |              |
| <b>Type of measurement HWTP *</b>                          | 0.0374   | 1.0381            | 0.0727    | 0.6071  |              |
| <b>Participation fee</b>                                   |          |                   |           |         |              |
| <b>Type of measurement HWTP *</b>                          | -0.0600  | 0.9418            | 0.2206    | 0.7856  |              |
| <b>Region</b>                                              |          |                   |           |         |              |
| <b>Type of measurement HWTP *</b>                          | 0.9617   | 2.6161            | 0.6575    | 0.5109  |              |
| <b>Variance ES</b>                                         |          |                   |           |         |              |
| $\tau^2$                                                   | 0.0027   |                   |           |         |              |
| <b>AICc</b>                                                | 42.3276  |                   |           |         |              |

Significance codes: \*\*\*  $p < 0.01$ ; \*\*  $p < 0.05$ ; \*  $p < 0.1$

Table WA7: Interaction model with product type

|                                                            | Estimate | EXP<br>(Estimate) | Std. Err. | p Value | Significance |
|------------------------------------------------------------|----------|-------------------|-----------|---------|--------------|
| <b>Intercept</b>                                           | -1.6217  | 0.1976            | 9.5724    | 0.8655  |              |
| <b>Type of measurement HWTP<br/>(indirect)</b>             | 0.0806   | 1.0839            | 0.0417    | 0.0534  | *            |
| <i>Type of measurement RWTP<br/>(indirect)</i>             | -0.0292  | 0.9712            | 0.0596    | 0.6236  |              |
| <i>Incentive compatible<br/>(yes)</i>                      | -0.0216  | 0.9786            | 0.0668    | 0.7467  |              |
| <b>Value</b>                                               | 0.0002   | 1.0002            | 0.0001    | 0.0537  | *            |
| <b>Product type<br/>(shopping)</b>                         | 0.0316   | 1.0321            | 0.0451    | 0.4838  |              |
| <b>Product type<br/>(specialty)</b>                        | 0.1844   | 1.2025            | 0.0489    | 0.0002  | ***          |
| <b>Innovation<br/>(yes)</b>                                | 0.0481   | 1.0493            | 0.0649    | 0.4590  |              |
| <i>Variance ES</i>                                         | 0.1380   | 1.1480            | 0.2534    | 0.5861  |              |
| <b>Type of subject design<br/>(within)</b>                 | 0.0808   | 1.0842            | 0.0437    | 0.0642  | *            |
| <b>Opportunity to test<br/>(yes)</b>                       | 0.0108   | 1.0109            | 0.0467    | 0.8170  |              |
| <b>Participation fee<br/>(yes)</b>                         | 0.0505   | 1.0518            | 0.0487    | 0.2997  |              |
| <b>Initial balance<br/>(yes)</b>                           | 0.3087   | 1.3617            | 0.1237    | 0.0125  | **           |
| <i>Type of experiment RWTP<br/>(lab)</i>                   | -0.0110  | 0.9891            | 0.0469    | 0.8150  |              |
| <i>Offline/online HWTP<br/>(online)</i>                    | -0.0993  | 0.9055            | 0.0628    | 0.1137  |              |
| <i>Student sample<br/>(yes)</i>                            | -0.1118  | 0.8942            | 0.0465    | 0.0163  | **           |
| <i>Introduction of method for RWTP<br/>(explanation)</i>   | 0.1026   | 1.1080            | 0.0630    | 0.1033  |              |
| <i>Introduction of method for RWTP<br/>(training)</i>      | 0.1746   | 1.1908            | 0.0861    | 0.0424  | **           |
| <i>Introduction of method for RWTP<br/>(not mentioned)</i> | 0.1693   | 1.1845            | 0.0797    | 0.0337  | **           |
| <i>Region<br/>(North America)</i>                          | -0.0406  | 0.9602            | 0.0494    | 0.4113  |              |
| <i>Citations</i>                                           | 0.0001   | 1.0001            | 0.0001    | 0.4271  |              |
| <i>Year</i>                                                | 0.0008   | 1.0008            | 0.0048    | 0.8631  |              |
| <b>Product type (shopping) *<br/>Initial balance</b>       | -0.2918  | 0.7469            | 0.1709    | 0.0878  | *            |
| <b>Product type (specialty) *<br/>Initial balance</b>      | -0.4108  | 0.6631            | 0.2110    | 0.0515  | *            |
| $\tau^2$                                                   | 0.0029   |                   |           |         |              |
| <b>AICc</b>                                                | 31.7854  |                   |           |         |              |

Significance codes: \*\*\*  $p < 0.01$ ; \*\*  $p < 0.05$ ; \*  $p < 0.1$



Table WA8: Interaction model with type of subject design

|                                                              | Estimate | EXP<br>(Estimate) | Std. Err. | p Value | Significanc<br>e |
|--------------------------------------------------------------|----------|-------------------|-----------|---------|------------------|
| <b>Intercept</b>                                             | -4.2216  | 0.0147            | 9.7491    | 0.6650  |                  |
| <b>Type of measurement HWTP<br/>(indirect)</b>               | 0.0641   | 1.0662            | 0.0423    | 0.1300  |                  |
| <i>Type of measurement RWTP<br/>(indirect)</i>               | -0.0076  | 0.9924            | 0.0592    | 0.8973  |                  |
| <i>Incentive compatible<br/>(yes)</i>                        | 0.0240   | 1.0243            | 0.0577    | 0.6779  |                  |
| <b>Value</b>                                                 | 0.0002   | 1.0002            | 0.0001    | 0.0549  | *                |
| <b>Product type<br/>(shopping)</b>                           | 0.0446   | 1.0456            | 0.0507    | 0.3788  |                  |
| <b>Product type<br/>(specialty)</b>                          | 0.1661   | 1.1807            | 0.0516    | 0.0013  | ***              |
| <b>Innovation<br/>(yes)</b>                                  | 0.0071   | 1.0071            | 0.0508    | 0.8886  |                  |
| <i>Variance ES</i>                                           | 0.1364   | 1.1461            | 0.2552    | 0.5931  |                  |
| <b>Type of subject design<br/>(within)</b>                   | 0.0558   | 1.0574            | 0.0605    | 0.3564  |                  |
| <b>Opportunity to test<br/>(yes)</b>                         | 0.0192   | 1.0194            | 0.0461    | 0.6766  |                  |
| <b>Participation fee<br/>(yes)</b>                           | 0.0708   | 1.0734            | 0.0521    | 0.1741  |                  |
| <b>Initial balance<br/>(yes)</b>                             | 0.0428   | 1.0437            | 0.0803    | 0.5942  |                  |
| <i>Type of experiment RWTP<br/>(lab)</i>                     | -0.0247  | 0.9756            | 0.0508    | 0.6260  |                  |
| <i>Offline/online HWTP<br/>(online)</i>                      | -0.0754  | 0.9274            | 0.0553    | 0.1732  |                  |
| <i>Student sample<br/>(yes)</i>                              | -0.0926  | 0.9116            | 0.0450    | 0.0397  | **               |
| <i>Introduction of method for RWTP<br/>(explanation)</i>     | 0.0496   | 1.0509            | 0.0569    | 0.3837  |                  |
| <i>Introduction of method for RWTP<br/>(training)</i>        | 0.1525   | 1.1647            | 0.0780    | 0.0506  | *                |
| <i>Introduction of method for RWTP<br/>(not mentioned)</i>   | 0.1121   | 1.1186            | 0.0770    | 0.1454  |                  |
| <i>Region<br/>(North America)</i>                            | -0.0524  | 0.9489            | 0.0521    | 0.3141  |                  |
| <i>Citations</i>                                             | 0.0001   | 1.0001            | 0.0001    | 0.2891  |                  |
| <i>Year</i>                                                  | 0.0021   | 1.0021            | 0.0048    | 0.6621  |                  |
| <b>Type of subject design *<br/>Type of measurement HWTP</b> | 0.2570   | 1.2930            | 0.1133    | 0.0233  | **               |
| <b>Type of subject design *<br/>Value</b>                    | -0.0004  | 0.9996            | 0.0017    | 0.8008  |                  |
| <b>Type of subject design *<br/>Variance ES</b>              | 2.8473   | 17.2412           | 2.3232    | 0.2204  |                  |
| <b>Type of measurement HWTP *<br/>Participation fee</b>      | -0.1139  | 0.8923            | 0.1229    | 0.3542  |                  |
| $\tau^2$                                                     | 0.0026   |                   |           |         |                  |
| AICc                                                         | 41.9816  |                   |           |         |                  |

Significance codes: \*\*\*  $p < 0.01$ ; \*\*  $p < 0.05$ ; \*  $p < 0.1$

Table WA9: Interaction model with introduction of method for RWTP

|                                                              | Estimate | EXP<br>(Estimate) | Std. Err. | p Value | Significance |
|--------------------------------------------------------------|----------|-------------------|-----------|---------|--------------|
| <b>Intercept</b>                                             | -0.8092  | 0.4452            | 9.2527    | 0.9303  |              |
| <b>Type of measurement HWTP<br/>(indirect)</b>               | 0.0984   | 1.1034            | 0.0386    | 0.0107  | **           |
| <i>Type of measurement RWTP<br/>(indirect)</i>               | 0.0013   | 1.0013            | 0.0564    | 0.9812  |              |
| <i>Incentive compatible<br/>(yes)</i>                        | 0.0543   | 1.0558            | 0.0560    | 0.3321  |              |
| <b>Value</b>                                                 | 0.0001   | 1.0001            | 0.0001    | 0.2203  |              |
| <b>Product type<br/>(shopping)</b>                           | 0.0427   | 1.0436            | 0.0430    | 0.3205  |              |
| <b>Product type<br/>(specialty)</b>                          | 0.1161   | 1.1231            | 0.0485    | 0.0167  | **           |
| <b>Innovation<br/>(yes)</b>                                  | -0.0128  | 0.9873            | 0.0502    | 0.7990  |              |
| <i>Variance ES</i>                                           | 0.1579   | 1.1710            | 0.2525    | 0.5318  |              |
| <b>Type of subject design<br/>(within)</b>                   | 0.1019   | 1.1073            | 0.0430    | 0.0177  | **           |
| <b>Opportunity to test<br/>(yes)</b>                         | 0.0157   | 1.0158            | 0.0458    | 0.7321  |              |
| <b>Participation fee<br/>(yes)</b>                           | 0.0607   | 1.0626            | 0.0479    | 0.2052  |              |
| <b>Initial balance<br/>(yes)</b>                             | 0.1211   | 1.1287            | 0.0735    | 0.0992  | *            |
| <i>Type of experiment RWTP<br/>(lab)</i>                     | -0.0111  | 0.9890            | 0.0496    | 0.8225  |              |
| <i>Offline/online HWTP<br/>(online)</i>                      | -0.0923  | 0.9118            | 0.0559    | 0.0990  | *            |
| <i>Student sample<br/>(yes)</i>                              | -0.1164  | 0.8901            | 0.0434    | 0.0074  | ***          |
| <i>Introduction of method for RWTP<br/>(explanation)</i>     | -0.0064  | 0.9936            | 0.0597    | 0.9149  |              |
| <i>Introduction of method for RWTP<br/>(training)</i>        | 0.0880   | 1.0920            | 0.0918    | 0.3376  |              |
| <i>Introduction of method for RWTP<br/>(not mentioned)</i>   | 0.1083   | 1.1144            | 0.0774    | 0.1616  |              |
| <i>Region<br/>(North America)</i>                            | -0.0883  | 0.9155            | 0.0457    | 0.0531  | *            |
| <i>Citations</i>                                             | 0.0001   | 1.0001            | 0.0001    | 0.3347  |              |
| <i>Year</i>                                                  | 0.0004   | 1.0004            | 0.0046    | 0.9258  |              |
| <i>Introduction of method for RWTP<br/>(explanation) *</i>   | 0.0020   | 1.0020            | 0.0007    | 0.0067  | ***          |
| <b>Value</b>                                                 |          |                   |           |         |              |
| <i>Introduction of method for RWTP<br/>(training) *</i>      | 0.0195   | 1.0197            | 0.0114    | 0.0874  | *            |
| <b>Value</b>                                                 |          |                   |           |         |              |
| <i>Introduction of method for RWTP<br/>(not mentioned) *</i> | -0.0000  | 1.0000            | 0.0002    | 0.9998  |              |
| <b>Value</b>                                                 |          |                   |           |         |              |
| $\tau^2$                                                     | 0.0023   |                   |           |         |              |
| AICc                                                         | 32.5096  |                   |           |         |              |

---

Significance codes: \*\*\*  $p < 0.01$ ; \*\*  $p < 0.05$ ; \*  $p < 0.1$

---

Table WA10: Interaction model including all significant interactions from the other interaction models

|                                                              | Full model |                   |              |            |              | Reduced model |                   |              |            |              |
|--------------------------------------------------------------|------------|-------------------|--------------|------------|--------------|---------------|-------------------|--------------|------------|--------------|
|                                                              | Estimate   | EXP<br>(Estimate) | Std.<br>Err. | p<br>Value | Significance | Estimate      | EXP<br>(Estimate) | Std.<br>Err. | p<br>Value | Significance |
| <b>Intercept</b>                                             | 1.3478     | 3.8489            | 9.2093       | 0.8836     |              | 0.1148        | 1.1216            | 0.0585       | 0.0496     | **           |
| <b>Type of measurement HWTP<br/>(indirect)</b>               | 0.0704     | 1.0729            | 0.0400       | 0.0783     | *            | 0.0750        | 1.0779            | 0.0374       | 0.0449     | **           |
| <i>Type of measurement RWTP<br/>(indirect)</i>               | 0.0229     | 1.0232            | 0.0562       | 0.6832     |              |               |                   |              |            |              |
| <i>Incentive compatible<br/>(yes)</i>                        | 0.0254     | 1.0257            | 0.0565       | 0.6832     |              |               |                   |              |            |              |
| <b>Value</b>                                                 | 0.0001     | 1.0001            | 0.0001       | 0.1950     |              | 0.0001        | 1.0001            | 0.0001       | 0.2165     |              |
| <b>Product type<br/>(shopping)</b>                           | 0.0291     | 1.0295            | 0.0428       | 0.4967     |              | -0.0067       | 0.9933            | 0.0331       | 0.8382     |              |
| <b>Product type<br/>(specialty)</b>                          | 0.1087     | 1.1148            | 0.0481       | 0.0237     | **           | 0.1253        | 1.1335            | 0.0357       | 0.0004     | ***          |
| <b>Innovation<br/>(yes)</b>                                  | 0.0020     | 1.0020            | 0.0501       | 0.9681     |              |               |                   |              |            |              |
| <i>Variance ES</i>                                           | 0.1404     | 1.1507            | 0.2525       | 0.5782     |              |               |                   |              |            |              |
| <b>Type of subject design<br/>(within)</b>                   | 0.0652     | 1.0674            | 0.0456       | 0.1534     |              | 0.0483        | 1.0495            | 0.0332       | 0.1458     |              |
| <b>Opportunity to test<br/>(yes)</b>                         | 0.0230     | 1.0233            | 0.0454       | 0.6129     |              |               |                   |              |            |              |
| <b>Participation fee<br/>(yes)</b>                           | 0.0572     | 1.0589            | 0.0472       | 0.2247     |              |               |                   |              |            |              |
| <b>Initial balance<br/>(yes)</b>                             | 0.0625     | 1.0645            | 0.0771       | 0.4172     |              |               |                   |              |            |              |
| <i>Type of experiment RWTP<br/>(lab)</i>                     | -0.0360    | 0.9646            | 0.0502       | 0.4726     |              |               |                   |              |            |              |
| <i>Offline/online HWTP<br/>(online)</i>                      | -0.0875    | 0.9162            | 0.0554       | 0.1143     |              | -0.0706       | 0.9318            | 0.0322       | 0.0283     | **           |
| <i>Student sample<br/>(yes)</i>                              | -0.0990    | 0.9057            | 0.0434       | 0.0226     | **           | -0.1127       | 0.8934            | 0.0319       | 0.0004     | ***          |
| <i>Introduction of method for<br/>RWTP<br/>(explanation)</i> | -0.0050    | 0.9950            | 0.0588       | 0.9325     |              | 0.0290        | 1.0294            | 0.0456       | 0.5246     |              |

|                                                          | Full model |                   |              |            |              | Reduced model |                   |              |            |              |
|----------------------------------------------------------|------------|-------------------|--------------|------------|--------------|---------------|-------------------|--------------|------------|--------------|
|                                                          | Estimate   | EXP<br>(Estimate) | Std.<br>Err. | p<br>Value | Significance | Estimate      | EXP<br>(Estimate) | Std.<br>Err. | p<br>Value | Significance |
| <i>Introduction of method for RWTP (training)</i>        | 0.0811     | 1.0845            | 0.0908       | 0.3714     |              | 0.0685        | 1.0709            | 0.0764       | 0.3701     |              |
| <i>Introduction of method for RWTP (not mentioned)</i>   | 0.1062     | 1.1120            | 0.0758       | 0.1613     |              | 0.1569        | 1.1699            | 0.0540       | 0.0036     | ***          |
| <i>Region (North America)</i>                            | -0.0666    | 0.9357            | 0.0462       | 0.1496     |              |               |                   |              |            |              |
| <i>Citations</i>                                         | 0.0001     | 1.0001            | 0.0001       | 0.3255     |              |               |                   |              |            |              |
| <i>Year</i>                                              | -0.0006    | 0.9994            | 0.0046       | 0.8908     |              |               |                   |              |            |              |
| <b>Type of measurement HWTP *</b>                        | 0.2250     | 1.2523            | 0.1029       | 0.0288     | **           | 0.2634        | 1.3013            | 0.0910       | 0.0038     | ***          |
| <b>Type of subject design Value *</b>                    | 0.0020     | 1.0020            | 0.0007       | 0.0061     | ***          | 0.0016        | 1.0016            | 0.0007       | 0.0183     | **           |
| <i>Introduction of method for RWTP * (explanation)</i>   |            |                   |              |            |              |               |                   |              |            |              |
| <b>Value *</b>                                           | 0.0200     | 1.0202            | 0.0113       | 0.0782     | *            | 0.0227        | 1.0230            | 0.0107       | 0.0336     | **           |
| <i>Introduction of method for RWTP * (training)</i>      |            |                   |              |            |              |               |                   |              |            |              |
| <b>Value *</b>                                           | 0.0000     | 1.0000            | 0.0002       | 0.9775     |              | 0.0000        | 1.0000            | 0.0002       | 0.9456     |              |
| <i>Introduction of method for RWTP * (not mentioned)</i> |            |                   |              |            |              |               |                   |              |            |              |
| $\tau^2$                                                 | 0.0021     |                   |              |            |              | 0.0021        |                   |              |            |              |
| AICc                                                     | 34.7720    |                   |              |            |              | -15.5697      |                   |              |            |              |

Significance codes: \*\*\*  $p < 0.01$ ; \*\*  $p < 0.05$ ; \*  $p < 0.1$

## Web Appendix G: Publications included in meta-analysis

Table WA11: Publications included in meta-analysis - Part I

| Authors                    | ES | Study | HWTP |        |        | RWTP |        |       | Type of measurement |        | Incentive compatible | Value  | Product type | Innovation |
|----------------------------|----|-------|------|--------|--------|------|--------|-------|---------------------|--------|----------------------|--------|--------------|------------|
|                            |    |       | N    | Mean   | SD     | N    | Mean   | SD    | HWTP                | RWTP   |                      |        |              |            |
| Alfnes et al. (2010)       | 1  | 1     | 27   | 2.46   | 1.43   | 66   | 1.92   | 1.22  | direct              | direct | yes                  | 1.92   | convenience  | no         |
| Alfnes et al. (2010)       | 2  | 1     | 24   | 1.85   | 1.07   | 22   | 1.02   | 0.80  | direct              | direct | yes                  | 1.02   | convenience  | no         |
| Alfnes et al. (2010)       | 3  | 1     | 27   | 1.30   | 1.16   | 22   | 0.92   | 0.87  | direct              | direct | yes                  | 0.92   | convenience  | no         |
| Alfnes et al. (2010)       | 4  | 1     | 27   | 0.51   | 0.81   | 22   | 0.58   | 0.67  | direct              | direct | yes                  | 0.58   | convenience  | no         |
| Alfnes et al. (2010)       | 5  | 2     | 26   | 3.41   | 1.59   | 77   | 1.94   | 1.29  | direct              | direct | yes                  | 1.94   | convenience  | no         |
| Alfnes et al. (2010)       | 6  | 2     | 27   | 2.64   | 1.48   | 55   | 1.69   | 1.11  | direct              | direct | yes                  | 1.69   | convenience  | no         |
| Backhaus et al. (2005)     | 7  | 3     | 365  | 212.15 | 64.56  | 63   | 193.05 | 60.85 | direct              | direct | no                   | 239.38 | shopping     | no         |
| Backhaus et al. (2005)     | 8  | 3     | 365  | 172.71 | 59.31  | 63   | 158.06 | 62.99 | direct              | direct | no                   | 195.99 | shopping     | no         |
| Backhaus et al. (2005)     | 9  | 3     | 365  | 200.50 | 66.91  | 63   | 181.48 | 58.48 | direct              | direct | no                   | 225.04 | shopping     | no         |
| Backhaus et al. (2005)     | 10 | 3     | 365  | 124.96 | 55.18  | 63   | 114.57 | 60.39 | direct              | direct | no                   | 142.07 | shopping     | no         |
| Backhaus et al. (2005)     | 11 | 4     | 313  | 287.84 | 125.90 | 63   | 193.05 | 60.85 | indirect            | direct | no                   | 432.43 | shopping     | no         |
| Backhaus et al. (2005)     | 12 | 4     | 313  | 229.06 | 120.29 | 63   | 158.06 | 62.99 | indirect            | direct | no                   | 512.11 | shopping     | no         |
| Backhaus et al. (2005)     | 13 | 4     | 313  | 275.79 | 140.45 | 63   | 181.48 | 58.48 | indirect            | direct | no                   | 769.48 | shopping     | no         |
| Backhaus et al. (2005)     | 14 | 4     | 313  | 153.68 | 127.45 | 63   | 114.57 | 60.39 | indirect            | direct | no                   | 600.35 | shopping     | no         |
| Balistreri et al. (2001)   | 15 | 5     | 345  | 4.58   | 5.38   | 52   | 3.66   | 1.15  | direct              | direct | no                   | 3.66   | shopping     | no         |
| Blumenschein et al. (2008) | 16 | 6     | 91   | 36.74  | 36.63  | 90   | 21.85  | 35.39 | direct              | direct | yes                  | 21.85  | shopping     | yes        |
| Blumenschein et al. (1997) | 17 | 7     | 37   | 11.97  | 19.27  | 24   | 3.24   | 4.77  | direct              | direct | yes                  | 3.24   | shopping     | no         |
| Botelho et al. (2013)      | 18 | 8     | 46   | 1.02   | 0.23   | 53   | 0.92   | 0.27  | direct              | direct | yes                  | 1.217  | convenience  | no         |

| Authors                             | ES | Study | HWTP |        |        | RWTP |        |        | Type of measurement |          | Incentive compatible | Value | Product type | Innovation |
|-------------------------------------|----|-------|------|--------|--------|------|--------|--------|---------------------|----------|----------------------|-------|--------------|------------|
|                                     |    |       | N    | Mean   | SD     | N    | Mean   | SD     | HWTP                | RWTP     |                      |       |              |            |
| <b>Botelho et al. (2013)</b>        | 19 | 8     | 37   | 0.99   | 0.38   | 53   | 1.09   | 0.32   | direct              | direct   | yes                  | 1.43  | convenience  | no         |
| <b>Brzowicz et al. (2017)</b>       | 20 | 9     | 76   | 33.99  | 11.28  | 66   | 27.28  | 20.56  | direct              | direct   | yes                  | 7.37  | shopping     | yes        |
| <b>Chowdhury et al. (2009/2011)</b> | 21 | 10    | 118  | 333.00 | 865.00 | 115  | 259.00 | 676.83 | indirect            | indirect | yes                  | 0.16  | convenience  | yes        |
| <b>Chowdhury et al. (2009/2011)</b> | 22 | 10    | 118  | 552.00 | 673.13 | 115  | 117.00 | 429.77 | indirect            | indirect | yes                  | 0.07  | convenience  | yes        |
| <b>Chowdhury et al. (2009/2011)</b> | 23 | 10    | 118  | 581.00 | 720.92 | 115  | 212.00 | 445.85 | indirect            | indirect | yes                  | 0.13  | convenience  | yes        |
| <b>Chowdhury et al. (2009/2011)</b> | 24 | 10    | 118  | 640.00 | 932.15 | 115  | 346.00 | 431.18 | indirect            | indirect | yes                  | 0.21  | convenience  | yes        |
| <b>Danneberg et al. (2009)</b>      | 25 | 11    | 26   | 1.19   | 1.25   | 39   | 0.64   | 0.64   | direct              | direct   | yes                  | 0.76  | specialty    | no         |
| <b>Dost and Wilken (2012)</b>       | 26 | 12    | 58   | 3.13   | 8.61   | 39   | 2.62   | 3.18   | direct              | direct   | yes                  | 3.35  | convenience  | no         |
| <b>Doyon et al. (2015)</b>          | 27 | 13    | 44   | 3.16   | 0.77   | 44   | 2.20   | 1.05   | direct              | direct   | yes                  | 2.20  | convenience  | yes        |
| <b>Fox et al. (1998)</b>            | 28 | 14    | 58   | 0.58   | 0.58   | 58   | 0.39   | 0.35   | direct              | direct   | yes                  | 0.39  | shopping     | yes        |
| <b>Fox et al. (1998)</b>            | 29 | 15    | 19   | 0.44   | 0.64   | 19   | 0.26   | 0.33   | direct              | direct   | yes                  | 0.26  | convenience  | no         |
| <b>Franke and Piller (2004)</b>     | 30 | 16    | 248  | 15.70  | 22.40  | 202  | 9.70   | 5.50   | direct              | direct   | yes                  | 12.03 | shopping     | yes        |
| <b>Franke and Piller (2004)</b>     | 31 | 16    | 248  | 17.70  | 23.10  | 202  | 10.20  | 5.90   | direct              | direct   | yes                  | 12.65 | shopping     | yes        |
| <b>Franke and Piller (2004)</b>     | 32 | 16    | 248  | 13.40  | 18.50  | 202  | 7.80   | 4.30   | direct              | direct   | yes                  | 9.67  | shopping     | yes        |
| <b>Franke and Piller (2004)</b>     | 33 | 16    | 248  | 16.30  | 20.00  | 202  | 8.50   | 5.10   | direct              | direct   | yes                  | 10.54 | shopping     | yes        |
| <b>Franke and Piller (2004)</b>     | 34 | 16    | 248  | 20.80  | 25.80  | 202  | 11.30  | 7.00   | direct              | direct   | yes                  | 14.01 | shopping     | yes        |
| <b>Franke and Piller (2004)</b>     | 35 | 16    | 248  | 19.10  | 32.70  | 202  | 15.50  | 14.90  | direct              | direct   | yes                  | 19.22 | shopping     | yes        |
| <b>Fryblom (1997)</b>               | 36 | 17    | 74   | 161.27 | 19.80  | 48   | 94.33  | 11.63  | direct              | direct   | yes                  | 12.26 | specialty    | no         |
| <b>Fryblom (1997)</b>               | 37 | 17    | 47   | 141.48 | 21.50  | 48   | 94.33  | 11.63  | direct              | direct   | yes                  | 12.26 | specialty    | no         |
| <b>Fryblom (2000)</b>               | 38 | 18    | 55   | 94.40  | 11.70  | 60   | 71.00  | 9.60   | direct              | direct   | yes                  | 7.81  | specialty    | no         |
| <b>Fryblom (2000)</b>               | 39 | 18    | 74   | 151.30 | 10.70  | 60   | 71.00  | 9.60   | direct              | direct   | yes                  | 7.81  | specialty    | no         |

| Authors                             | ES | Study | HWTP |        |        | RWTP |       |        | Type of measurement |        | Incentive compatible | Value | Product type | Innovation |
|-------------------------------------|----|-------|------|--------|--------|------|-------|--------|---------------------|--------|----------------------|-------|--------------|------------|
|                                     |    |       | N    | Mean   | SD     | N    | Mean  | SD     | HWTP                | RWTP   |                      |       |              |            |
| <b>Fuchs et al. (2010)</b>          | 40 | 19    | 65   | 20.74  | 8.93   | 76   | 15.41 | 12.72  | direct              | direct | yes                  | 20.50 | convenience  | yes        |
| <b>Fuchs et al. (2010)</b>          | 41 | 20    | 63   | 17.24  | 8.91   | 55   | 9.56  | 9.18   | direct              | direct | yes                  | 12.71 | convenience  | yes        |
| <b>Gneezy et al. (2006)</b>         | 42 | 21    | 46   | 65.02  | 81.50  | 50   | 38.59 | 23.85  | direct              | direct | yes                  | 38.59 | shopping     | no         |
| <b>Gneezy et al. (2006)</b>         | 43 | 22    | 44   | 34.09  | 56.30  | 50   | 18.03 | 22.76  | direct              | direct | yes                  | 18.03 | shopping     | no         |
| <b>Hofstetter and Miller (2009)</b> | 44 | 23    | 506  | 39.50  | 26.35  | 802  | 28.51 | 22.79  | direct              | direct | yes                  | 26.51 | specialty    | yes        |
| <b>Hofstetter and Miller (2009)</b> | 45 | 24    | 535  | 37.16  | 23.21  | 802  | 28.51 | 22.79  | direct              | direct | yes                  | 26.51 | specialty    | yes        |
| <b>Hofstetter and Miller (2009)</b> | 46 | 25    | 1007 | 29.86  | 31.80  | 802  | 28.51 | 22.79  | direct              | direct | yes                  | 26.51 | specialty    | yes        |
| <b>Johannesson (1997)</b>           | 47 | 26    | 12   | 133.33 | 78.78  | 13   | 81.62 | 62.99  | direct              | direct | yes                  | 9.45  | convenience  | yes        |
| <b>Johannesson et al. (1997)</b>    | 48 | 27    | 10   | 89.50  | 75.37  | 10   | 87.40 | 39.47  | direct              | direct | yes                  | 13.11 | convenience  | yes        |
| <b>Johannesson et al. (1998)</b>    | 49 | 28    | 123  | 35.26  | 27.50  | 119  | 29.95 | 18.54  | direct              | direct | yes                  | 4.19  | convenience  | no         |
| <b>Kealy et al. (1988)</b>          | 50 | 29    | 80   | 0.80   | 0.98   | 82   | 0.56  | 0.68   | direct              | direct | yes                  | 0.56  | convenience  | no         |
| <b>Kesternich et al. (2013)</b>     | 51 | 30    | 1525 | 29.86  | 169.87 | 470  | 12.86 | 63.52  | indirect            | direct | yes                  | 12.86 | shopping     | no         |
| <b>Kimenju et al. (2005)</b>        | 52 | 31    | 50   | 72.36  | 13.65  | 50   | 12.66 | 11.40  | indirect            | direct | yes                  | 0.16  | convenience  | no         |
| <b>Kimenju et al. (2005)</b>        | 53 | 32    | 50   | 94.48  | 304.37 | 50   | 11.68 | 12.00  | indirect            | direct | yes                  | 0.15  | convenience  | no         |
| <b>Kunter (2016)</b>                | 54 | 33    | 95   | 0.80   | 0.68   | 68   | 0.41  | 0.23   | direct              | direct | yes                  | 0.46  | shopping     | no         |
| <b>List (2001)</b>                  | 55 | 34    | 41   | 116.09 | 777.98 | 40   | 59.56 | 387.06 | direct              | direct | yes                  | 59.56 | specialty    | no         |
| <b>List (2001)</b>                  | 56 | 35    | 89   | 49.03  | 754.34 | 86   | 25.60 | 428.72 | direct              | direct | yes                  | 25.60 | specialty    | no         |
| <b>List (2003)</b>                  | 57 | 36    | 30   | 6.67   | 27.82  | 30   | 2.28  | 11.34  | direct              | direct | yes                  | 2.28  | specialty    | no         |
| <b>List (2003)</b>                  | 58 | 37    | 30   | 7.40   | 35.77  | 30   | 2.78  | 17.03  | direct              | direct | yes                  | 2.78  | specialty    | no         |
| <b>List (2003)</b>                  | 59 | 38    | 30   | 7.18   | 34.18  | 30   | 3.67  | 13.04  | direct              | direct | yes                  | 3.67  | specialty    | no         |
| <b>List (2003)</b>                  | 60 | 39    | 30   | 8.65   | 52.41  | 30   | 3.42  | 12.10  | direct              | direct | yes                  | 3.42  | specialty    | no         |



| Authors                                        | ES | Study | HWTP |        |        | RWTP |        |        | Type of measurement |          | Incentive compatible | Value  | Product type | Innovation |
|------------------------------------------------|----|-------|------|--------|--------|------|--------|--------|---------------------|----------|----------------------|--------|--------------|------------|
|                                                |    |       | N    | Mean   | SD     | N    | Mean   | SD     | HWTP                | RWTP     |                      |        |              |            |
| List and Shogren (1998)                        | 61 | 40    | 99   | 142.02 | 126.67 | 99   | 55.87  | 82.90  | direct              | direct   | yes                  | 55.87  | specialty    | no         |
| List and Shogren (1998)                        | 62 | 41    | 93   | 91.71  | 102.60 | 93   | 26.40  | 52.20  | direct              | direct   | yes                  | 26.40  | specialty    | no         |
| List and Shogren (1998)                        | 63 | 42    | 30   | 208.80 | 81.00  | 30   | 95.50  | 88.10  | direct              | direct   | yes                  | 95.50  | specialty    | no         |
| Loomis et al. (1997)                           | 64 | 43    | 35   | 42.34  | 67.33  | 35   | 11.63  | 11.36  | direct              | direct   | no                   | 11.63  | specialty    | yes        |
| Loomis et al. (1996)                           | 65 | 44    | 33   | 26.29  | 5.06   | 32   | 14.48  | 3.58   | direct              | direct   | no                   | 14.48  | specialty    | yes        |
| Miller et al. (2011)                           | 66 | 45    | 279  | 11.03  | 8.18   | 183  | 8.96   | 7.65   | direct              | direct   | yes                  | 10.12  | convenience  | yes        |
| Miller et al. (2011)                           | 67 | 46    | 279  | 11.03  | 8.18   | 151  | 9.39   | 4.74   | direct              | indirect | yes                  | 10.61  | convenience  | yes        |
| Miller et al. (2011)                           | 68 | 47    | 310  | 14.92  | 8.33   | 183  | 8.96   | 7.65   | indirect            | direct   | yes                  | 10.12  | convenience  | yes        |
| Miller et al. (2011)                           | 69 | 48    | 310  | 14.92  | 8.33   | 151  | 9.39   | 4.74   | indirect            | indirect | yes                  | 10.61  | convenience  | yes        |
| Miller et al. (2011)                           | 70 | 49    | 152  | 292.39 | 148.53 | 94   | 100.71 | 155.52 | direct              | direct   | yes                  | 113.80 | convenience  | yes        |
| Miller et al. (2011)                           | 71 | 50    | 207  | 247.38 | 174.56 | 94   | 100.71 | 155.52 | indirect            | direct   | yes                  | 113.80 | convenience  | yes        |
| Moser et al. (2014)                            | 72 | 51    | 96   | 1.84   | 4.70   | 96   | 0.64   | 2.47   | indirect            | indirect | yes                  | 0.85   | convenience  | no         |
| Murphy et al (2010)                            | 73 | 52    | 28   | 4.43   | 3.60   | 25   | 2.08   | 2.25   | direct              | direct   | yes                  | 2.08   | convenience  | no         |
| Neill et al (1994)                             | 74 | 53    | 44   | 109.00 | 127.00 | 60   | 12.00  | 21.00  | direct              | direct   | yes                  | 12.00  | specialty    | yes        |
| Neill et al (1994)                             | 75 | 54    | 41   | 37.04  | 30.34  | 16   | 9.49   | 11.57  | direct              | direct   | yes                  | 9.49   | specialty    | yes        |
| Paradiso and Trisorio (2001)                   | 76 | 55    | 25   | 37.79  | 18.38  | 25   | 10.91  | 5.02   | direct              | direct   | yes                  | 15.71  | specialty    | yes        |
| Paradiso and Trisorio (2001)                   | 77 | 56    | 25   | 8.41   | 4.60   | 25   | 3.01   | 1.22   | direct              | direct   | yes                  | 4.33   | specialty    | yes        |
| Sattler and Nitschke (2003);<br>Völcner (2006) | 78 | 57    | 334  | 7.36   | 5.95   | 253  | 7.48   | 6.26   | indirect            | direct   | yes                  | 4.11   | shopping     | no         |
| Sattler and Nitschke (2003);<br>Völcner (2006) | 79 | 57    | 334  | 7.44   | 6.56   | 253  | 6.93   | 6.20   | indirect            | direct   | yes                  | 3.81   | shopping     | no         |

| Authors                                         | ES | Study | HWTP |      |      | RWTP |      |      | Type of measurement |        | Incentive compatible | Value | Product type | Innovation |
|-------------------------------------------------|----|-------|------|------|------|------|------|------|---------------------|--------|----------------------|-------|--------------|------------|
|                                                 |    |       | N    | Mean | SD   | N    | Mean | SD   | HWTP                | RWTP   |                      |       |              |            |
| Sattler and Nitschke (2003);<br>Völckner (2006) | 80 | 57    | 334  | 6.66 | 7.81 | 253  | 6.42 | 6.02 | indirect            | direct | yes                  | 3.53  | shopping     | no         |
| Sattler and Nitschke (2003);<br>Völckner (2006) | 81 | 57    | 334  | 2.46 | 6.23 | 253  | 2.82 | 4.16 | indirect            | direct | yes                  | 1.55  | shopping     | no         |
| Sattler and Nitschke (2003);<br>Völckner (2006) | 82 | 58    | 334  | 7.36 | 5.95 | 269  | 7.45 | 6.19 | indirect            | direct | no                   | 4.10  | shopping     | no         |
| Sattler and Nitschke (2003);<br>Völckner (2006) | 83 | 58    | 334  | 7.44 | 6.56 | 269  | 6.91 | 6.12 | indirect            | direct | no                   | 3.80  | shopping     | no         |
| Sattler and Nitschke (2003);<br>Völckner (2006) | 84 | 58    | 334  | 6.66 | 7.81 | 269  | 6.44 | 6.1  | indirect            | direct | no                   | 3.54  | shopping     | no         |
| Sattler and Nitschke (2003);<br>Völckner (2006) | 85 | 58    | 334  | 2.46 | 6.23 | 269  | 2.90 | 4.44 | indirect            | direct | no                   | 1.60  | shopping     | no         |
| Sattler and Nitschke (2003);<br>Völckner (2006) | 86 | 59    | 639  | 7.49 | 6.42 | 253  | 7.48 | 6.26 | direct              | direct | yes                  | 4.11  | shopping     | no         |
| Sattler and Nitschke (2003);<br>Völckner (2006) | 87 | 59    | 639  | 6.88 | 6.12 | 253  | 6.93 | 6.2  | direct              | direct | yes                  | 3.81  | shopping     | no         |
| Sattler and Nitschke (2003);<br>Völckner (2006) | 88 | 59    | 639  | 6.38 | 5.94 | 253  | 6.42 | 6.02 | direct              | direct | yes                  | 3.53  | shopping     | no         |
| Sattler and Nitschke (2003);<br>Völckner (2006) | 89 | 59    | 639  | 2.01 | 5.45 | 253  | 2.82 | 4.16 | direct              | direct | yes                  | 1.55  | shopping     | no         |
| Sattler and Nitschke (2003);<br>Völckner (2006) | 90 | 60    | 639  | 7.49 | 6.42 | 269  | 7.45 | 6.19 | direct              | direct | no                   | 4.10  | shopping     | no         |
| Sattler and Nitschke (2003);<br>Völckner (2006) | 91 | 60    | 639  | 6.88 | 6.12 | 269  | 6.91 | 6.12 | direct              | direct | no                   | 3.80  | shopping     | no         |
| Sattler and Nitschke (2003);<br>Völckner (2006) | 92 | 60    | 639  | 6.38 | 5.94 | 269  | 6.44 | 6.10 | direct              | direct | no                   | 3.54  | shopping     | no         |
| Sattler and Nitschke (2003);<br>Völckner (2006) | 93 | 60    | 639  | 2.01 | 5.45 | 269  | 2.90 | 4.44 | direct              | direct | no                   | 1.60  | shopping     | no         |

| Authors                              | ES  | Study | HWTP |         |         | RWTP |        |        | Type of measurement |          | Incentive compatible | Value  | Product type | Innovation |
|--------------------------------------|-----|-------|------|---------|---------|------|--------|--------|---------------------|----------|----------------------|--------|--------------|------------|
|                                      |     |       | N    | Mean    | SD      | N    | Mean   | SD     | HWTP                | RWTP     |                      |        |              |            |
| <b>Schlag (2008)</b>                 | 94  | 61    | 129  | 989.29  | 1638.81 | 595  | 453.95 | 267.81 | indirect            | direct   | no                   | 667.31 | shopping     | no         |
| <b>Schlag (2008)</b>                 | 95  | 61    | 129  | 1154.10 | 2445.34 | 3952 | 467.83 | 281.62 | indirect            | direct   | no                   | 687.71 | shopping     | no         |
| <b>Schlag (2008)</b>                 | 96  | 62    | 87   | 0.94    | 0.99    | 460  | 0.51   | 0.21   | indirect            | direct   | no                   | 0.75   | shopping     | no         |
| <b>Schlag (2008)</b>                 | 97  | 62    | 87   | 0.79    | 0.99    | 638  | 0.54   | 0.25   | indirect            | direct   | no                   | 0.79   | shopping     | no         |
| <b>Schlag (2008)</b>                 | 98  | 62    | 87   | 1.40    | 2.62    | 183  | 0.54   | 0.30   | indirect            | direct   | no                   | 0.79   | shopping     | no         |
| <b>Schmidt (2016)</b>                | 99  | 63    | 74   | 42.30   | 43.83   | 15   | 53.11  | 51.60  | direct              | direct   | yes                  | 58.95  | specialty    | yes        |
| <b>Schmidt (2016)</b>                | 100 | 63    | 72   | 50.42   | 53.34   | 15   | 53.11  | 51.60  | direct              | direct   | yes                  | 58.95  | specialty    | yes        |
| <b>Schmidt (2016)</b>                | 101 | 63    | 156  | 65.60   | 59.03   | 15   | 53.11  | 51.60  | direct              | direct   | yes                  | 58.95  | specialty    | yes        |
| <b>Schreier and Werfer (2007)</b>    | 102 | 64    | 104  | 164.43  | 105.47  | 109  | 84.68  | 68.62  | direct              | direct   | yes                  | 116.01 | specialty    | no         |
| <b>Schreier and Werfer (2007)</b>    | 103 | 64    | 104  | 164.43  | 105.47  | 110  | 72.96  | 58.68  | direct              | direct   | yes                  | 99.96  | specialty    | no         |
| <b>Schwaha (2009)</b>                | 104 | 65    | 81   | 1.16    | 0.82    | 81   | 0.74   | 0.59   | direct              | direct   | yes                  | 1.03   | convenience  | no         |
| <b>Schwaha (2009)</b>                | 105 | 66    | 187  | 1.41    | 0.69    | 187  | 0.89   | 0.57   | direct              | direct   | yes                  | 1.24   | convenience  | no         |
| <b>Schwaha (2009)</b>                | 106 | 67    | 77   | 1.19    | 0.76    | 77   | 0.85   | 0.52   | direct              | direct   | yes                  | 1.18   | convenience  | no         |
| <b>Schwaha (2009)</b>                | 107 | 68    | 109  | 1.41    | 0.60    | 109  | 1.00   | 0.49   | direct              | direct   | yes                  | 1.39   | convenience  | no         |
| <b>Wang et al. (2007)</b>            | 108 | 69    | 83   | 2.39    | 1.21    | 128  | 2.94   | 1.70   | direct              | direct   | yes                  | 2.94   | convenience  | no         |
| <b>Wang et al. (2007)</b>            | 109 | 69    | 83   | 2.39    | 1.21    | 104  | 3.14   | 2.75   | direct              | direct   | yes                  | 3.14   | convenience  | no         |
| <b>Wertenbroch and Skiera (2002)</b> | 110 | 70    | 100  | 1.35    | 0.81    | 100  | 1.06   | 0.66   | direct              | direct   | yes                  | 0.58   | convenience  | no         |
| <b>Wertenbroch and Skiera (2002)</b> | 111 | 71    | 100  | 1.68    | 0.82    | 100  | 1.12   | 0.56   | direct              | direct   | yes                  | 0.62   | convenience  | no         |
| <b>Wertenbroch and Skiera (2002)</b> | 112 | 72    | 85   | 3.04    | 1.87    | 85   | 1.33   | 1.21   | direct              | direct   | yes                  | 0.73   | specialty    | no         |
| <b>Wlömert and Eggers (2016)</b>     | 113 | 73    | 281  | 4.37    | 7.79    | 450  | 3.52   | 3.99   | direct              | indirect | yes                  | 4.68   | shopping     | yes        |
| <b>Wlömert and Eggers (2016)</b>     | 114 | 74    | 960  | 5.22    | 4.26    | 450  | 3.52   | 3.99   | indirect            | indirect | yes                  | 4.68   | shopping     | yes        |

| Authors                  | ES  | Study | HWTP |       |       | RWTP |       |      | Type of measurement |        | Incentive compatible | Value | Product type | Innovation |
|--------------------------|-----|-------|------|-------|-------|------|-------|------|---------------------|--------|----------------------|-------|--------------|------------|
|                          |     |       | N    | Mean  | SD    | N    | Mean  | SD   | HWTP                | RWTP   |                      |       |              |            |
| <b>Yue et al. (2010)</b> | 115 | 75    | 834  | 0.61  | 2.53  | 113  | 0.366 | 0.73 | indirect            | direct | yes                  | 0.37  | specialty    | no         |
| <b>Zanger (2018)</b>     | 116 | 76    | 92   | 13.00 | 8.35  | 92   | 10.04 | 7.09 | direct              | direct | yes                  | 12.35 | shopping     | yes        |
| <b>Zanger (2018)</b>     | 117 | 77    | 92   | 24.77 | 19.07 | 92   | 10.04 | 7.09 | indirect            | direct | yes                  | 12.35 | shopping     | yes        |

Table WA12: Publications included in meta-analysis - Part II

| Authors                | Product/<br>service | Type of<br>subject<br>design | Possibility<br>to test | Participation<br>fee | Initial<br>balance | Type of<br>experiment |      | Offline/<br>online |         | Student<br>sample | Introduction<br>of method<br>for RWTP | Region                             |
|------------------------|---------------------|------------------------------|------------------------|----------------------|--------------------|-----------------------|------|--------------------|---------|-------------------|---------------------------------------|------------------------------------|
|                        |                     |                              |                        |                      |                    | HWTP                  | RWTP | HWTP               | RWTP    |                   |                                       |                                    |
| Alfnes et al. (2010)   | product             | between                      | no                     | yes                  | no                 | lab                   | lab  | offline            | offline | no                | <i>not mentioned</i>                  | North America                      |
| Alfnes et al. (2010)   | product             | between                      | no                     | yes                  | no                 | lab                   | lab  | offline            | offline | no                | <i>not mentioned</i>                  | North America                      |
| Alfnes et al. (2010)   | product             | between                      | no                     | yes                  | no                 | lab                   | lab  | offline            | offline | no                | <i>not mentioned</i>                  | North America                      |
| Alfnes et al. (2010)   | product             | between                      | no                     | yes                  | no                 | lab                   | lab  | offline            | offline | no                | <i>not mentioned</i>                  | North America                      |
| Alfnes et al. (2010)   | product             | between                      | no                     | yes                  | no                 | lab                   | lab  | offline            | offline | no                | <i>not mentioned</i>                  | North America                      |
| Alfnes et al. (2010)   | product             | between                      | no                     | yes                  | no                 | lab                   | lab  | offline            | offline | no                | <i>not mentioned</i>                  | North America                      |
| Backhaus et al. (2005) | service             | between                      | no                     | no                   | no                 | lab                   | lab  | offline            | offline | yes               | <i>nothing</i>                        | other countries<br>(mainly Europe) |
| Backhaus et al. (2005) | service             | between                      | no                     | no                   | no                 | lab                   | lab  | offline            | offline | yes               | <i>nothing</i>                        | other countries<br>(mainly Europe) |
| Backhaus et al. (2005) | service             | between                      | no                     | no                   | no                 | lab                   | lab  | offline            | offline | yes               | <i>nothing</i>                        | other countries<br>(mainly Europe) |
| Backhaus et al. (2005) | service             | between                      | no                     | no                   | no                 | lab                   | lab  | offline            | offline | yes               | <i>nothing</i>                        | other countries<br>(mainly Europe) |
| Backhaus et al. (2005) | service             | between                      | no                     | no                   | no                 | lab                   | lab  | offline            | offline | yes               | <i>nothing</i>                        | other countries<br>(mainly Europe) |
| Backhaus et al. (2005) | service             | between                      | no                     | no                   | no                 | lab                   | lab  | offline            | offline | yes               | <i>nothing</i>                        | other countries<br>(mainly Europe) |

| Authors                             | Product/<br>service | Type of<br>subject<br>design | Possibility<br>to test | Participation<br>fee | Initial<br>balance | Type of<br>experiment |       | Offline/<br>online |         | Student<br>sample | Introduction<br>of method<br>for RWTP | Region                             |
|-------------------------------------|---------------------|------------------------------|------------------------|----------------------|--------------------|-----------------------|-------|--------------------|---------|-------------------|---------------------------------------|------------------------------------|
|                                     |                     |                              |                        |                      |                    | HWTP                  | RWTP  | HWTP               | RWTP    |                   |                                       |                                    |
| <b>Backhaus et al. (2005)</b>       | service             | between                      | no                     | no                   | no                 | lab                   | lab   | offline            | offline | yes               | <i>nothing</i>                        | other countries<br>(mainly Europe) |
| <b>Balistreri et al. (2001)</b>     | service             | between                      | no                     | no                   | yes                | lab                   | lab   | offline            | offline | yes               | <i>training</i>                       | North America                      |
| <b>Blumenschein et al. (2008)</b>   | service             | between                      | no                     | no                   | no                 | field                 | field | offline            | offline | no                | <i>nothing</i>                        | North America                      |
| <b>Blumenschein et al. (1997)</b>   | service             | between                      | no                     | yes                  | no                 | lab                   | lab   | offline            | offline | yes               | <i>explanation</i>                    | North America                      |
| <b>Botelho et al. (2013)</b>        | product             | between                      | yes                    | no                   | no                 | field                 | field | offline            | offline | no                | <i>explanation</i>                    | other countries<br>(mainly Europe) |
| <b>Botelho et al. (2013)</b>        | product             | between                      | yes                    | no                   | no                 | field                 | field | offline            | offline | no                | <i>explanation</i>                    | other countries<br>(mainly Europe) |
| <b>Brzozowicz et al. (2017)</b>     | product             | between                      | yes                    | no                   | no                 | lab                   | lab   | offline            | offline | yes               | <i>explanation</i>                    | other countries<br>(mainly Europe) |
| <b>Chowdhury et al. (2009/2011)</b> | product             | between                      | yes                    | yes                  | yes                | field                 | field | offline            | offline | no                | <i>nothing</i>                        | other countries<br>(mainly Europe) |
| <b>Chowdhury et al. (2009/2011)</b> | product             | between                      | yes                    | yes                  | yes                | field                 | field | offline            | offline | no                | <i>nothing</i>                        | other countries<br>(mainly Europe) |
| <b>Chowdhury et al. (2009/2011)</b> | product             | between                      | yes                    | yes                  | yes                | field                 | field | offline            | offline | no                | <i>nothing</i>                        | other countries<br>(mainly Europe) |
| <b>Chowdhury et al. (2009/2011)</b> | product             | between                      | yes                    | yes                  | yes                | field                 | field | offline            | offline | no                | <i>nothing</i>                        | other countries<br>(mainly Europe) |
| <b>Danneberg et al. (2009)</b>      | product             | between                      | yes                    | yes                  | no                 | lab                   | lab   | offline            | offline | no                | <i>training</i>                       | other countries<br>(mainly Europe) |
| <b>Dost and Wilken (2012)</b>       | product             | between                      | no                     | yes                  | no                 | lab                   | field | online             | offline | no                | <i>nothing</i>                        | other countries<br>(mainly Europe) |
| <b>Doyon et al. (2015)</b>          | product             | between                      | no                     | yes                  | no                 | lab                   | lab   | offline            | offline | no                | <i>training</i>                       | North America                      |
| <b>Fox et al. (1998)</b>            | product             | within                       | no                     | no                   | no                 | field                 | lab   | offline            | offline | no                | <i>training</i>                       | North America                      |
| <b>Fox et al. (1998)</b>            | product             | within                       | no                     | no                   | no                 | field                 | lab   | offline            | offline | no                | <i>training</i>                       | North America                      |

| Authors                         | Product/<br>service | Type of<br>subject<br>design | Possibility<br>to test | Participation<br>fee | Initial<br>balance | Type of<br>experiment |       | Offline/<br>online |         | Student<br>sample | Introduction<br>of method<br>for RWTP | Region                             |
|---------------------------------|---------------------|------------------------------|------------------------|----------------------|--------------------|-----------------------|-------|--------------------|---------|-------------------|---------------------------------------|------------------------------------|
|                                 |                     |                              |                        |                      |                    | HWTP                  | RWTP  | HWTP               | RWTP    |                   |                                       |                                    |
| <b>Franke and Piller (2004)</b> | product             | between                      | no                     | yes                  | no                 | lab                   | lab   | offline            | offline | yes               | <i>not mentioned</i>                  | other countries<br>(mainly Europe) |
| <b>Franke and Piller (2004)</b> | product             | between                      | no                     | yes                  | no                 | lab                   | lab   | offline            | offline | yes               | <i>not mentioned</i>                  | other countries<br>(mainly Europe) |
| <b>Franke and Piller (2004)</b> | product             | between                      | no                     | yes                  | no                 | lab                   | lab   | offline            | offline | yes               | <i>not mentioned</i>                  | other countries<br>(mainly Europe) |
| <b>Franke and Piller (2004)</b> | product             | between                      | no                     | yes                  | no                 | lab                   | lab   | offline            | offline | yes               | <i>not mentioned</i>                  | other countries<br>(mainly Europe) |
| <b>Franke and Piller (2004)</b> | product             | between                      | no                     | yes                  | no                 | lab                   | lab   | offline            | offline | yes               | <i>not mentioned</i>                  | other countries<br>(mainly Europe) |
| <b>Franke and Piller (2004)</b> | product             | between                      | no                     | yes                  | no                 | lab                   | lab   | offline            | offline | yes               | <i>not mentioned</i>                  | other countries<br>(mainly Europe) |
| <b>Fryblom (1997)</b>           | product             | between                      | yes                    | yes                  | no                 | lab                   | lab   | offline            | offline | yes               | <i>explanation</i>                    | other countries<br>(mainly Europe) |
| <b>Fryblom (1997)</b>           | product             | between                      | yes                    | yes                  | no                 | lab                   | lab   | offline            | offline | yes               | <i>explanation</i>                    | other countries<br>(mainly Europe) |
| <b>Fryblom (2000)</b>           | product             | between                      | yes                    | yes                  | no                 | lab                   | lab   | offline            | offline | yes               | <i>not mentioned</i>                  | other countries<br>(mainly Europe) |
| <b>Fryblom (2000)</b>           | product             | between                      | yes                    | yes                  | no                 | lab                   | lab   | offline            | offline | yes               | <i>not mentioned</i>                  | other countries<br>(mainly Europe) |
| <b>Fuchs et al. (2010)</b>      | product             | between                      | yes                    | no                   | no                 | field                 | lab   | online             | offline | no                | <i>explanation</i>                    | other countries<br>(mainly Europe) |
| <b>Fuchs et al. (2010)</b>      | product             | between                      | yes                    | no                   | no                 | field                 | lab   | online             | offline | no                | <i>explanation</i>                    | other countries<br>(mainly Europe) |
| <b>Gneezy et al. (2006)</b>     | service             | between                      | yes                    | no                   | no                 | field                 | field | offline            | offline | no                | <i>explanation</i>                    | North America                      |
| <b>Gneezy et al. (2006)</b>     | service             | between                      | yes                    | no                   | no                 | field                 | field | offline            | offline | no                | <i>explanation</i>                    | North America                      |

| Authors                             | Product/<br>service | Type of<br>subject<br>design | Possibility<br>to test | Participation<br>fee | Initial<br>balance | Type of<br>experiment |       | Offline/<br>online |         | Student<br>sample | Introduction<br>of method<br>for RWTP | Region                             |
|-------------------------------------|---------------------|------------------------------|------------------------|----------------------|--------------------|-----------------------|-------|--------------------|---------|-------------------|---------------------------------------|------------------------------------|
|                                     |                     |                              |                        |                      |                    | HWTP                  | RWTP  | HWTP               | RWTP    |                   |                                       |                                    |
| <b>Hofstetter and Miller (2009)</b> | product             | within                       | no                     | no                   | no                 | field                 | field | online             | online  | yes               | <i>nothing</i>                        | other countries<br>(mainly Europe) |
| <b>Hofstetter and Miller (2009)</b> | product             | within                       | no                     | no                   | no                 | field                 | field | online             | online  | yes               | <i>nothing</i>                        | other countries<br>(mainly Europe) |
| <b>Hofstetter and Miller (2009)</b> | product             | within                       | no                     | no                   | no                 | field                 | field | online             | online  | yes               | <i>nothing</i>                        | other countries<br>(mainly Europe) |
| <b>Johannesson (1997)</b>           | product             | between                      | yes                    | no                   | no                 | lab                   | lab   | offline            | offline | yes               | <i>explanation</i>                    | other countries<br>(mainly Europe) |
| <b>Johannesson et al. (1997)</b>    | product             | between                      | yes                    | no                   | no                 | lab                   | lab   | offline            | offline | yes               | <i>explanation</i>                    | other countries<br>(mainly Europe) |
| <b>Johannesson et al. (1998)</b>    | product             | between                      | yes                    | yes                  | no                 | lab                   | lab   | offline            | offline | yes               | <i>not<br/>mentioned</i>              | other countries<br>(mainly Europe) |
| <b>Kealy et al. (1988)</b>          | product             | between                      | no                     | no                   | no                 | lab                   | lab   | offline            | offline | yes               | <i>not<br/>mentioned</i>              | North America                      |
| <b>Kesternich et al. (2013)</b>     | service             | between                      | no                     | no                   | no                 | field                 | field | online             | online  | no                | <i>not<br/>mentioned</i>              | North America                      |
| <b>Kimenju et al. (2005)</b>        | product             | within                       | no                     | no                   | yes                | field                 | field | offline            | offline | no                | <i>training</i>                       | other countries<br>(mainly Europe) |
| <b>Kimenju et al. (2005)</b>        | product             | within                       | no                     | no                   | yes                | field                 | field | offline            | offline | no                | <i>training</i>                       | other countries<br>(mainly Europe) |
| <b>Kunter (2016)</b>                | product             | between                      | no                     | no                   | no                 | field                 | field | offline            | offline | no                | <i>explanation</i>                    | other countries<br>(mainly Europe) |
| <b>List (2001)</b>                  | product             | between                      | yes                    | no                   | no                 | field                 | field | offline            | offline | no                | <i>explanation</i>                    | North America                      |
| <b>List (2001)</b>                  | product             | between                      | yes                    | no                   | no                 | field                 | field | offline            | offline | no                | <i>explanation</i>                    | North America                      |
| <b>List (2003)</b>                  | product             | between                      | yes                    | no                   | no                 | field                 | field | offline            | offline | no                | <i>explanation</i>                    | North America                      |
| <b>List (2003)</b>                  | product             | between                      | yes                    | no                   | no                 | field                 | field | offline            | offline | no                | <i>explanation</i>                    | North America                      |



| Authors                 | Product/<br>service | Type of<br>subject<br>design | Possibility<br>to test | Participation<br>fee | Initial<br>balance | Type of<br>experiment |       | Offline/<br>online |         | Student<br>sample | Introduction<br>of method<br>for RWTP | Region                             |
|-------------------------|---------------------|------------------------------|------------------------|----------------------|--------------------|-----------------------|-------|--------------------|---------|-------------------|---------------------------------------|------------------------------------|
|                         |                     |                              |                        |                      |                    | HWTP                  | RWTP  | HWTP               | RWTP    |                   |                                       |                                    |
| List (2003)             | product             | between                      | yes                    | no                   | no                 | field                 | field | offline            | offline | no                | <i>explanation</i>                    | North America                      |
| List (2003)             | product             | between                      | yes                    | no                   | no                 | field                 | field | offline            | offline | no                | <i>explanation</i>                    | North America                      |
| List and Shogren (1998) | product             | within                       | yes                    | no                   | no                 | field                 | field | offline            | offline | no                | <i>explanation</i>                    | North America                      |
| List and Shogren (1998) | product             | within                       | yes                    | no                   | no                 | field                 | field | offline            | offline | no                | <i>explanation</i>                    | North America                      |
| List and Shogren (1998) | product             | within                       | yes                    | no                   | no                 | field                 | field | offline            | offline | no                | <i>explanation</i>                    | North America                      |
| Loomis et al. (1997)    | product             | within                       | yes                    | yes                  | yes                | lab                   | lab   | offline            | offline | yes               | <i>explanation</i>                    | North America                      |
| Loomis et al. (1996)    | product             | between                      | yes                    | yes                  | yes                | lab                   | lab   | offline            | offline | no                | <i>explanation</i>                    | North America                      |
| Miller et al. (2011)    | product             | between                      | no                     | yes                  | no                 | lab                   | lab   | online             | online  | no                | <i>explanation</i>                    | other countries<br>(mainly Europe) |
| Miller et al. (2011)    | product             | between                      | no                     | yes                  | no                 | lab                   | lab   | online             | online  | no                | <i>explanation</i>                    | other countries<br>(mainly Europe) |
| Miller et al. (2011)    | product             | between                      | no                     | yes                  | no                 | lab                   | lab   | online             | online  | no                | <i>explanation</i>                    | other countries<br>(mainly Europe) |
| Miller et al. (2011)    | product             | between                      | no                     | yes                  | no                 | lab                   | lab   | online             | online  | no                | <i>explanation</i>                    | other countries<br>(mainly Europe) |
| Miller et al. (2011)    | product             | between                      | no                     | yes                  | no                 | lab                   | lab   | online             | online  | no                | <i>explanation</i>                    | other countries<br>(mainly Europe) |
| Miller et al. (2011)    | product             | between                      | no                     | yes                  | no                 | lab                   | lab   | online             | online  | no                | <i>explanation</i>                    | other countries<br>(mainly Europe) |
| Moser et al. (2014)     | product             | between                      | no                     | yes                  | no                 | field                 | field | online             | online  | no                | <i>explanation</i>                    | other countries<br>(mainly Europe) |
| Murphy et al (2010)     | product             | between                      | no                     | yes                  | yes                | lab                   | lab   | online             | online  | yes               | <i>training</i>                       | North America                      |
| Neill et al (1994)      | product             | between                      | yes                    | yes                  | no                 | lab                   | lab   | offline            | offline | yes               | <i>training</i>                       | North America                      |
| Neill et al (1994)      | product             | between                      | yes                    | yes                  | no                 | lab                   | lab   | offline            | offline | yes               | <i>training</i>                       | North America                      |

| Authors                                                 | Product/<br>service | Type of<br>subject<br>design | Possibility<br>to test | Participation<br>fee | Initial<br>balance | Type of<br>experiment |      | Offline/<br>online |         | Student<br>sample | Introduction<br>of method<br>for RWTP | Region                             |
|---------------------------------------------------------|---------------------|------------------------------|------------------------|----------------------|--------------------|-----------------------|------|--------------------|---------|-------------------|---------------------------------------|------------------------------------|
|                                                         |                     |                              |                        |                      |                    | HWTP                  | RWTP | HWTP               | RWTP    |                   |                                       |                                    |
| <b>Paradiso and Trisorio (2001)</b>                     | product             | between                      | no                     | yes                  | no                 | lab                   | lab  | offline            | offline | yes               | <i>training</i>                       | other countries<br>(mainly Europe) |
| <b>Paradiso and Trisorio (2001)</b>                     | product             | between                      | no                     | yes                  | no                 | lab                   | lab  | offline            | offline | yes               | <i>training</i>                       | other countries<br>(mainly Europe) |
| <b>Sattler and Nitschke (2003);<br/>Völckner (2006)</b> | service             | between                      | no                     | no                   | no                 | lab                   | lab  | offline            | offline | yes               | <i>explanation</i>                    | other countries<br>(mainly Europe) |
| <b>Sattler and Nitschke (2003);<br/>Völckner (2006)</b> | service             | between                      | no                     | no                   | no                 | lab                   | lab  | offline            | offline | yes               | <i>explanation</i>                    | other countries<br>(mainly Europe) |
| <b>Sattler and Nitschke (2003);<br/>Völckner (2006)</b> | service             | between                      | no                     | no                   | no                 | lab                   | lab  | offline            | offline | yes               | <i>explanation</i>                    | other countries<br>(mainly Europe) |
| <b>Sattler and Nitschke (2003);<br/>Völckner (2006)</b> | service             | between                      | no                     | no                   | no                 | lab                   | lab  | offline            | offline | yes               | <i>explanation</i>                    | other countries<br>(mainly Europe) |
| <b>Sattler and Nitschke (2003);<br/>Völckner (2006)</b> | service             | between                      | no                     | no                   | no                 | lab                   | lab  | offline            | offline | yes               | <i>explanation</i>                    | other countries<br>(mainly Europe) |
| <b>Sattler and Nitschke (2003);<br/>Völckner (2006)</b> | service             | between                      | no                     | no                   | no                 | lab                   | lab  | offline            | offline | yes               | <i>explanation</i>                    | other countries<br>(mainly Europe) |
| <b>Sattler and Nitschke (2003);<br/>Völckner (2006)</b> | service             | between                      | no                     | no                   | no                 | lab                   | lab  | offline            | offline | yes               | <i>explanation</i>                    | other countries<br>(mainly Europe) |
| <b>Sattler and Nitschke (2003);<br/>Völckner (2006)</b> | service             | between                      | no                     | no                   | no                 | lab                   | lab  | offline            | offline | yes               | <i>explanation</i>                    | other countries<br>(mainly Europe) |
| <b>Sattler and Nitschke (2003);<br/>Völckner (2006)</b> | service             | between                      | no                     | no                   | no                 | lab                   | lab  | offline            | offline | yes               | <i>explanation</i>                    | other countries<br>(mainly Europe) |
| <b>Sattler and Nitschke (2003);<br/>Völckner (2006)</b> | service             | between                      | no                     | no                   | no                 | lab                   | lab  | offline            | offline | yes               | <i>explanation</i>                    | other countries<br>(mainly Europe) |

| Authors                                                 | Product/<br>service | Type of<br>subject<br>design | Possibility<br>to test | Participation<br>fee | Initial<br>balance | Type of<br>experiment |       | Offline/<br>online |         | Student<br>sample | Introduction<br>of method<br>for RWTP | Region                             |
|---------------------------------------------------------|---------------------|------------------------------|------------------------|----------------------|--------------------|-----------------------|-------|--------------------|---------|-------------------|---------------------------------------|------------------------------------|
|                                                         |                     |                              |                        |                      |                    | HWTP                  | RWTP  | HWTP               | RWTP    |                   |                                       |                                    |
| <b>Sattler and Nitschke (2003);<br/>Völckner (2006)</b> | service             | between                      | no                     | no                   | no                 | lab                   | lab   | offline            | offline | yes               | <i>explanation</i>                    | other countries<br>(mainly Europe) |
| <b>Sattler and Nitschke (2003);<br/>Völckner (2006)</b> | service             | between                      | no                     | no                   | no                 | lab                   | lab   | offline            | offline | yes               | <i>explanation</i>                    | other countries<br>(mainly Europe) |
| <b>Sattler and Nitschke (2003);<br/>Völckner (2006)</b> | service             | between                      | no                     | no                   | no                 | lab                   | lab   | offline            | offline | yes               | <i>explanation</i>                    | other countries<br>(mainly Europe) |
| <b>Sattler and Nitschke (2003);<br/>Völckner (2006)</b> | service             | between                      | no                     | no                   | no                 | lab                   | lab   | offline            | offline | yes               | <i>explanation</i>                    | other countries<br>(mainly Europe) |
| <b>Schlag (2008)</b>                                    | product             | between                      | no                     | yes                  | no                 | field                 | field | online             | online  | no                | <i>not<br/>mentioned</i>              | other countries<br>(mainly Europe) |
| <b>Schlag (2008)</b>                                    | product             | between                      | no                     | yes                  | no                 | field                 | field | online             | online  | no                | <i>not<br/>mentioned</i>              | other countries<br>(mainly Europe) |
| <b>Schlag (2008)</b>                                    | product             | between                      | no                     | yes                  | no                 | field                 | field | online             | online  | no                | <i>not<br/>mentioned</i>              | other countries<br>(mainly Europe) |
| <b>Schlag (2008)</b>                                    | product             | between                      | no                     | yes                  | no                 | field                 | field | online             | online  | no                | <i>not<br/>mentioned</i>              | other countries<br>(mainly Europe) |
| <b>Schlag (2008)</b>                                    | product             | between                      | no                     | yes                  | no                 | field                 | field | online             | online  | no                | <i>not<br/>mentioned</i>              | other countries<br>(mainly Europe) |
| <b>Schmidt (2016)</b>                                   | service             | between                      | no                     | no                   | no                 | lab                   | lab   | online             | online  | yes               | <i>explanation</i>                    | other countries<br>(mainly Europe) |
| <b>Schmidt (2016)</b>                                   | service             | between                      | no                     | no                   | no                 | lab                   | lab   | online             | online  | yes               | <i>explanation</i>                    | other countries<br>(mainly Europe) |
| <b>Schmidt (2016)</b>                                   | service             | between                      | no                     | no                   | no                 | lab                   | lab   | online             | online  | yes               | <i>explanation</i>                    | other countries<br>(mainly Europe) |
| <b>Schreier and Werfer (2007)</b>                       | product             | between                      | yes                    | no                   | no                 | lab                   | lab   | offline            | offline | yes               | <i>explanation</i>                    | other countries<br>(mainly Europe) |
| <b>Schreier and Werfer (2007)</b>                       | product             | between                      | yes                    | no                   | no                 | lab                   | lab   | offline            | offline | yes               | <i>explanation</i>                    | other countries<br>(mainly Europe) |

| Authors                              | Product/<br>service | Type of<br>subject<br>design | Possibility<br>to test | Participation<br>fee | Initial<br>balance | Type of<br>experiment |       | Offline/<br>online |         | Student<br>sample | Introduction<br>of method<br>for RWTP | Region                             |
|--------------------------------------|---------------------|------------------------------|------------------------|----------------------|--------------------|-----------------------|-------|--------------------|---------|-------------------|---------------------------------------|------------------------------------|
|                                      |                     |                              |                        |                      |                    | HWTP                  | RWTP  | HWTP               | RWTP    |                   |                                       |                                    |
| <b>Schwaha (2009)</b>                | product             | within                       | yes                    | no                   | no                 | field                 | field | offline            | offline | no                | <i>explanation</i>                    | other countries<br>(mainly Europe) |
| <b>Schwaha (2009)</b>                | product             | within                       | yes                    | no                   | no                 | field                 | field | offline            | offline | no                | <i>explanation</i>                    | other countries<br>(mainly Europe) |
| <b>Schwaha (2009)</b>                | product             | within                       | yes                    | no                   | no                 | field                 | field | offline            | offline | yes               | <i>explanation</i>                    | other countries<br>(mainly Europe) |
| <b>Schwaha (2009)</b>                | product             | within                       | yes                    | no                   | no                 | field                 | field | offline            | offline | yes               | <i>explanation</i>                    | other countries<br>(mainly Europe) |
| <b>Wang et al. (2007)</b>            | product             | between                      | yes                    | no                   | no                 | lab                   | lab   | offline            | offline | yes               | <i>explanation</i>                    | North America                      |
| <b>Wang et al. (2007)</b>            | product             | between                      | yes                    | no                   | no                 | lab                   | lab   | offline            | offline | yes               | <i>explanation</i>                    | North America                      |
| <b>Wertenbroch and Skiera (2002)</b> | product             | between                      | no                     | no                   | no                 | field                 | field | offline            | offline | no                | <i>explanation</i>                    | other countries<br>(mainly Europe) |
| <b>Wertenbroch and Skiera (2002)</b> | product             | between                      | no                     | no                   | no                 | field                 | field | offline            | offline | no                | <i>explanation</i>                    | other countries<br>(mainly Europe) |
| <b>Wertenbroch and Skiera (2002)</b> | product             | between                      | no                     | no                   | no                 | lab                   | lab   | offline            | offline | no                | <i>explanation</i>                    | other countries<br>(mainly Europe) |
| <b>Wlömert and Eggers (2016)</b>     | service             | between                      | no                     | no                   | no                 | field                 | field | online             | online  | no                | <i>explanation</i>                    | other countries<br>(mainly Europe) |
| <b>Wlömert and Eggers (2016)</b>     | service             | between                      | no                     | no                   | no                 | field                 | field | online             | online  | no                | <i>explanation</i>                    | other countries<br>(mainly Europe) |
| <b>Yue et al. (2010)</b>             | product             | between                      | yes                    | yes                  | no                 | lab                   | lab   | online             | offline | no                | <i>training</i>                       | North America                      |
| <b>Zanger (2018)</b>                 | product             | within                       | no                     | yes                  | no                 | lab                   | lab   | online             | online  | no                | <i>explanation</i>                    | other countries<br>(mainly Europe) |
| <b>Zanger (2018)</b>                 | product             | within                       | no                     | yes                  | no                 | lab                   | lab   | online             | online  | no                | <i>explanation</i>                    | other countries<br>(mainly Europe) |

Table WA13: Publications included in meta-analysis - Part III

| <b>Authors</b>                      | <b>Peer reviewed</b> | <b>Discipline</b> | <b>Citations</b> |
|-------------------------------------|----------------------|-------------------|------------------|
| <b>Alfnes et al. (2010)</b>         | yes                  | economics         | 53               |
| <b>Alfnes et al. (2010)</b>         | yes                  | economics         | 53               |
| <b>Alfnes et al. (2010)</b>         | yes                  | economics         | 53               |
| <b>Alfnes et al. (2010)</b>         | yes                  | economics         | 53               |
| <b>Alfnes et al. (2010)</b>         | yes                  | economics         | 53               |
| <b>Alfnes et al. (2010)</b>         | yes                  | economics         | 53               |
| <b>Backhaus et al. (2005)</b>       | yes                  | marketing         | 85               |
| <b>Backhaus et al. (2005)</b>       | yes                  | marketing         | 85               |
| <b>Backhaus et al. (2005)</b>       | yes                  | marketing         | 85               |
| <b>Backhaus et al. (2005)</b>       | yes                  | marketing         | 85               |
| <b>Backhaus et al. (2005)</b>       | yes                  | marketing         | 85               |
| <b>Backhaus et al. (2005)</b>       | yes                  | marketing         | 85               |
| <b>Backhaus et al. (2005)</b>       | yes                  | marketing         | 85               |
| <b>Backhaus et al. (2005)</b>       | yes                  | marketing         | 85               |
| <b>Backhaus et al. (2005)</b>       | yes                  | marketing         | 85               |
| <b>Backhaus et al. (2005)</b>       | yes                  | marketing         | 85               |
| <b>Balistreri et al. (2001)</b>     | yes                  | economics         | 153              |
| <b>Blumenschein et al. (2008)</b>   | yes                  | economics         | 347              |
| <b>Blumenschein et al. (1997)</b>   | yes                  | economics         | 36               |
| <b>Botelho et al. (2013)</b>        | no                   | economics         | 7                |
| <b>Botelho et al. (2013)</b>        | no                   | economics         | 7                |
| <b>Brzozowicz et al. (2017)</b>     | no                   | marketing         | 0                |
| <b>Chowdhury et al. (2009/2011)</b> | yes                  | economics         | 121              |

| <b>Authors</b>                      | <b>Peer reviewed</b> | <b>Discipline</b> | <b>Citations</b> |
|-------------------------------------|----------------------|-------------------|------------------|
| <b>Chowdhury et al. (2009/2011)</b> | yes                  | economics         | 121              |
| <b>Chowdhury et al. (2009/2011)</b> | yes                  | economics         | 121              |
| <b>Chowdhury et al. (2009/2011)</b> | yes                  | economics         | 121              |
| <b>Danneberg et al. (2009)</b>      | yes                  | economics         | 6                |
| <b>Dost and Wilken (2012)</b>       | yes                  | marketing         | 28               |
| <b>Doyon et al. (2015)</b>          | yes                  | economics         | 1                |
| <b>Fox et al. (1998)</b>            | yes                  | economics         | 313              |
| <b>Fox et al. (1998)</b>            | yes                  | economics         | 313              |
| <b>Franke and Piller (2004)</b>     | yes                  | marketing         | 805              |
| <b>Franke and Piller (2004)</b>     | yes                  | marketing         | 805              |
| <b>Franke and Piller (2004)</b>     | yes                  | marketing         | 805              |
| <b>Franke and Piller (2004)</b>     | yes                  | marketing         | 805              |
| <b>Franke and Piller (2004)</b>     | yes                  | marketing         | 805              |
| <b>Franke and Piller (2004)</b>     | yes                  | marketing         | 805              |
| <b>Fryblom (1997)</b>               | yes                  | economics         | 141              |
| <b>Fryblom (1997)</b>               | yes                  | economics         | 141              |
| <b>Fryblom (2000)</b>               | yes                  | economics         | 33               |
| <b>Fryblom (2000)</b>               | yes                  | economics         | 33               |
| <b>Fuchs et al. (2010)</b>          | yes                  | marketing         | 351              |
| <b>Fuchs et al. (2010)</b>          | yes                  | marketing         | 351              |
| <b>Gneezy et al. (2006)</b>         | yes                  | economics         | 239              |
| <b>Gneezy et al. (2006)</b>         | yes                  | economics         | 239              |

| <b>Authors</b>                      | <b>Peer reviewed</b> | <b>Discipline</b> | <b>Citations</b> |
|-------------------------------------|----------------------|-------------------|------------------|
| <b>Hofstetter and Miller (2009)</b> | no                   | marketing         | 12               |
| <b>Hofstetter and Miller (2009)</b> | no                   | marketing         | 12               |
| <b>Hofstetter and Miller (2009)</b> | no                   | marketing         | 12               |
| <b>Johannesson (1997)</b>           | yes                  | economics         | 27               |
| <b>Johannesson et al. (1997)</b>    | yes                  | economics         | 47               |
| <b>Johannesson et al. (1998)</b>    | yes                  | economics         | 238              |
| <b>Kealy et al. (1988)</b>          | yes                  | economics         | 135              |
| <b>Kesternich et al. (2013)</b>     | yes                  | economics         | 30               |
| <b>Kimenju et al. (2005)</b>        | no                   | economics         | 25               |
| <b>Kimenju et al. (2005)</b>        | no                   | economics         | 25               |
| <b>Kunter (2016)</b>                | yes                  | marketing         | 3                |
| <b>List (2001)</b>                  | yes                  | economics         | 479              |
| <b>List (2001)</b>                  | yes                  | economics         | 479              |
| <b>List (2003)</b>                  | yes                  | economics         | 49               |
| <b>List (2003)</b>                  | yes                  | economics         | 49               |
| <b>List (2003)</b>                  | yes                  | economics         | 49               |
| <b>List (2003)</b>                  | yes                  | economics         | 49               |
| <b>List and Shogren (1998)</b>      | yes                  | economics         | 270              |
| <b>List and Shogren (1998)</b>      | yes                  | economics         | 270              |
| <b>List and Shogren (1998)</b>      | yes                  | economics         | 270              |
| <b>Loomis et al. (1997)</b>         | yes                  | economics         | 150              |
| <b>Loomis et al. (1996)</b>         | yes                  | economics         | 233              |





| <b>Authors</b>                                          | <b>Peer reviewed</b> | <b>Discipline</b> | <b>Citations</b> |
|---------------------------------------------------------|----------------------|-------------------|------------------|
| <b>Sattler and Nitschke (2003);<br/>Völckner (2006)</b> | yes                  | marketing         | 161              |
| <b>Sattler and Nitschke (2003);<br/>Völckner (2006)</b> | yes                  | marketing         | 161              |
| <b>Sattler and Nitschke (2003);<br/>Völckner (2006)</b> | yes                  | marketing         | 161              |
| <b>Sattler and Nitschke (2003);<br/>Völckner (2006)</b> | yes                  | marketing         | 161              |
| <b>Sattler and Nitschke (2003);<br/>Völckner (2006)</b> | yes                  | marketing         | 161              |
| <b>Sattler and Nitschke (2003);<br/>Völckner (2006)</b> | yes                  | marketing         | 161              |
| <b>Sattler and Nitschke (2003);<br/>Völckner (2006)</b> | yes                  | marketing         | 161              |
| <b>Sattler and Nitschke (2003);<br/>Völckner (2006)</b> | yes                  | marketing         | 161              |
| <b>Sattler and Nitschke (2003);<br/>Völckner (2006)</b> | yes                  | marketing         | 161              |
| <b>Schlag (2008)</b>                                    | no                   | marketing         | 5                |
| <b>Schlag (2008)</b>                                    | no                   | marketing         | 5                |
| <b>Schlag (2008)</b>                                    | no                   | marketing         | 5                |
| <b>Schlag (2008)</b>                                    | no                   | marketing         | 5                |
| <b>Schlag (2008)</b>                                    | no                   | marketing         | 5                |
| <b>Schmidt (2016)</b>                                   | no                   | marketing         | 0                |
| <b>Schmidt (2016)</b>                                   | no                   | marketing         | 0                |
| <b>Schmidt (2016)</b>                                   | no                   | marketing         | 0                |
| <b>Schreier and Werfer (2007)</b>                       | yes                  | economics         | 15               |

| <b>Authors</b>                       | <b>Peer reviewed</b> | <b>Discipline</b> | <b>Citations</b> |
|--------------------------------------|----------------------|-------------------|------------------|
| <b>Schreier and Werfer (2007)</b>    | yes                  | economics         | 15               |
| <b>Schwaha (2009)</b>                | no                   | marketing         | 0                |
| <b>Schwaha (2009)</b>                | no                   | marketing         | 0                |
| <b>Schwaha (2009)</b>                | no                   | marketing         | 0                |
| <b>Schwaha (2009)</b>                | no                   | marketing         | 0                |
| <b>Wang et al. (2007)</b>            | yes                  | marketing         | 147              |
| <b>Wang et al. (2007)</b>            | yes                  | marketing         | 147              |
| <b>Wertenbroch and Skiera (2002)</b> | yes                  | marketing         | 687              |
| <b>Wertenbroch and Skiera (2002)</b> | yes                  | marketing         | 687              |
| <b>Wertenbroch and Skiera (2002)</b> | yes                  | marketing         | 687              |
| <b>Wlömert and Eggers (2016)</b>     | yes                  | marketing         | 18               |
| <b>Wlömert and Eggers (2016)</b>     | yes                  | marketing         | 18               |
| <b>Yue et al. (2010)</b>             | yes                  | economics         | 61               |
| <b>Zanger (2018)</b>                 | no                   | marketing         | 0                |
| <b>Zanger (2018)</b>                 | no                   | marketing         | 0                |

## References Web Appendix

- Alfnes, F., Yue, C., & Jensen, H. H. (2010). Cognitive dissonance as a means of reducing hypothetical bias. *European Review of Agricultural Economics*, 37(2), 147-163.
- Backhaus, K., Wilken, R., Voeth, M., & Sichtmann, C. (2005a). An empirical comparison of methods. *International Journal of Market Research*, 47(5), 541–560.
- Backhaus, K., Voeth, M., Sichtmann, C., & Wilken, R. (2005b). Conjoint-Analyse versus direkte Preisabfrage zur Erhebung von Zahlungsbereitschaften: Eine modifizierte Replikationsstudie. *Die Betriebswirtschaft*, 65(5), 439–457.
- Balistreri, E., McClelland, G., Poe, G., & Schulze, W. (2001). Can hypothetical questions reveal true values? A laboratory comparison of dichotomous choice and open-ended contingent values with auction values. *Environmental & Resource Economics*, 18(3), 275–292.
- Blumenschein, K., Johannesson, M., Blomquist, G. C., Liljas, B., O’Conor, R. M. (1997). Hypothetical versus real payments in Vickrey auctions. *Economic Letters*, 56(2), 177-180.
- Blumenschein, K., Blomquist, G. C., Johannesson, M., Horn, N., & Freeman, P. (2008). Eliciting willingness to pay without bias: Evidence from a field experiment. *The Economic Journal*, 118(525), 114-137.
- Botelho, A., Lourenco-Gomes L. S., & Pinto, L. M. (2013). Consumer preferences for apple: Comparing the results of contingent valuation method and a real purchasing situation (Working Paper Series of the Universidade do Minho). Retrieved from <https://repositorium.sdum.uminho.pt/bitstream/1822/26354/1/NIMAwP51.pdf>
- Brzozowicz, M., Krawczyk, M., & Kusztelak, P. (2017). Do anchors hold for real? Anchoring effect and hypothetical bias in declared WTP (Working Paper Series of the Faculty of Economics Sciences/University of Warsaw No. 24/2017 (253)). Retrieved from [https://www.wne.uw.edu.pl/files/3715/1522/7033/WNE\\_WP253.pdf](https://www.wne.uw.edu.pl/files/3715/1522/7033/WNE_WP253.pdf)
- Carson, R. T., Flores, N. E., Martin, K. M., & Wright, J. L. (1996). Contingent valuation and revealed preference methodologies: Comparing the estimates for quasi-public goods. *Land Economics*, 72(1), 80–99.
- Chowdhury, S., Meenakshi, J. V., Tomlins, K., & Owori, C. (2009). Are consumers in developing countries willing-to-pay more for micronutrient-dense biofortified foods? Evidence from a field experiment in Uganda. Paper presented at the *International Association of Agricultural Economists Conference*. Retrieved from <https://ageconsearch.umn.edu/record/49945/files/Chowdhury%20et%20al%202009%20WTP%20for%20Biofortified%20Food%20in%20Uganda.pdf>
- Chowdhury, S., Meenakshi, J. V., Tomlins, K., & Owori, C. (2011). Are consumers in developing countries willing to pay more for micronutrient-dense biofortified foods?

- Evidence from a field experiment in Uganda. *American Journal of Agricultural Economics*, 93(1), 83-97.
- Dannenberg, A., Scatasta, S., & Sturm, B. (2009). Keine Chance für genetisch veränderte Lebensmittel in Deutschland? Eine experimentelle Analyse von Zahlungsbereitschaften. *Perspektiven der Wirtschaftspolitik*, 10(2), 214-234.
- Dost, F., & Wilken, R. (2012). Measuring willingness to pay as a range, revisited: When should we care? *International Journal of Research in Marketing*, 29(2), 148–166.
- Doyon, M., Saulais, L., Ruffieux, B., & Bweli, D. (2015). Hypothetical bias for private goods: Does cheap talk make a difference? *Theoretical Economics Letters*, 5(6), 749–756.
- Fox, J. A., Shogren, J. F., Hayes, D. J., & Kliebenstein, J. B. (1998). CVM-X: Calibrating contingent values with experimental auction markets. *American Journal of Agricultural Economics*, 80(3), 455–465.
- Franke, N., & Piller, F. (2004). Value creation by toolkits for user innovation and design: The case of the watch market. *Journal of Product Innovation Management*, 21(6), 401–415.
- Frykblom, P. (1997). Hypothetical question modes and real willingness to pay. *Journal of Environmental Economics and Management*, 34(3), 275–287.
- Frykblom, P. (2000). Willingness to pay and the choice of question format: Experimental results. *Applied Economics Letters*, 7(10), 665–667.
- Fuchs, C., Prandelli, E., & Schreier, M. (2010). The psychological effects of empowerment strategies on consumers' product demand. *Journal of Marketing*, 74(1), 65–79.
- Gleser, L. J., & Olkin, I. (2009). Stochastically dependent effect sizes. In H. Cooper, L. V. Hedges, & J. C. Valentine (Eds.), *The handbook of research synthesis and meta-analysis* (2<sup>nd</sup> ed., pp. 357–376). New York, New York: Russel Sage Foundation.
- Gneezy, U., List, J. A., & Wu, G. (2006). The uncertainty effect: When a risky prospect is valued less than its worst possible outcome. *The Quarterly Journal of Economics*, 121(4), 1283-1309.
- Hofstetter, R., & Miller, K. M. (2009). Measuring consumers' willingness to pay: Do direct approaches really work? In R. Hofstetter & K. M. Miller (Eds.), *Precision pricing: Measuring consumers' willingness to pay accurately*. Norderstedt, Germany: Books on Demand.
- Hofstetter, R., Miller, K. M., Krohmer, H., & Zhang, Z. J. (2013). How do consumer characteristics affect the bias in measuring willingness to pay for innovative products? *Journal of Product Innovation Management*, 30(5), 1042–1053.
- Hunt, S. D. (1976). The nature and scope of marketing. *Journal of Marketing*, 40(3), 17-28.

- Johannesson, M. (1997). Some further experimental results on hypothetical versus real willingness to pay. *Applied Economics Letters*, 4(8), 535–536.
- Johannesson, M., Liljas, B., & O’Conor, R. M. (1997). Hypothetical versus real willingness to pay: Some experimental results. *Applied Economics Letters*, 4(3), 149–151.
- Johannesson, M., Liljas, B., Johansson, P.-O. (1998). An experimental comparison of dichotomous choice contingent valuation questions and real purchase decisions. *Applied Economics*, 30(5), 643-647.
- Kealy, M. J., Dovidio, J. F., & Rockel, M. L. (1988). Accuracy in valuation is a matter of degree. *Land Economics*, 64(2), 158-171.
- Kesternich, I., Heiss, F., McFadden, D., & Winter, J. (2013). Suit the action to the word, the word to the action: Hypothetical choices and real decisions in Medicare Part D. *Journal of Health Economics*, 32(6), 1313-1324.
- Kimenju, S. C., Morawetz, U. B., & De Groote, H. (2005). Comparing contingent valuation method, choice experiments and experimental auctions in soliciting consumer preference for maize in Western Kenya: Preliminary results (Presentation at the African Econometric Society 10<sup>th</sup> annual conference on econometric modeling in Africa, Nairobi, Kenya). Retrieved from [https://www.researchgate.net/profile/Hugo\\_De\\_Groote/publication/254549821\\_Comparing\\_Contingent\\_Valuation\\_Method\\_Choice\\_Experiments\\_and\\_Experimental\\_Auctions\\_in\\_soliciting\\_Consumer\\_preference\\_for\\_maize\\_in\\_Western\\_Kenya\\_Preliminary\\_results/links/544df5cb0cf294731619e087/Comparing-Contingent-Valuation-Method-Choice-Experiments-and-Experimental-Auctions-in-soliciting-Consumer-preference-for-maize-in-Western-Kenya-Preliminary-results.pdf](https://www.researchgate.net/profile/Hugo_De_Groote/publication/254549821_Comparing_Contingent_Valuation_Method_Choice_Experiments_and_Experimental_Auctions_in_soliciting_Consumer_preference_for_maize_in_Western_Kenya_Preliminary_results/links/544df5cb0cf294731619e087/Comparing-Contingent-Valuation-Method-Choice-Experiments-and-Experimental-Auctions-in-soliciting-Consumer-preference-for-maize-in-Western-Kenya-Preliminary-results.pdf)
- Kunter, M. (2016). The van Westendorp price-sensitivity meter as a measure of willingness-to-pay. *European Journal of Management*, 16(2), 45–54.
- Lajeunesse, M. J. (2011). On the meta-analysis of response ratios for studies with correlated and multi-group designs. *Ecology*, 92(11), 2049–2055.
- Lamberton, C. P., & Rose, R. L. (2012). When is ours better than mine? A framework for understanding and altering participation in commercial sharing systems. *Journal of Marketing* 76(4), 109-125.
- List, J. A. (2001). Do explicit warnings eliminate the hypothetical bias in elicitation procedures? Evidence from field auctions for sports cards. *American Economic Review*, 91(5), 1498-1507.
- List, J. A. (2003). Using random nth price auction to value non-market goods and services. *Journal of Regulatory Economics*, 23(2), 193-205.

- List, J. A., & Gallet, C. A. (2001). What experimental protocol influence disparities between actual and hypothetical stated values? Evidence from a meta-analysis. *Environmental & Resource Economics*, 20(3), 241–254.
- List, J. A., & Shogren, J. F. (1998). Calibration of the difference between actual and hypothetical valuations in a field experiment. *Journal of Economic Behavior & Organization*, 37(2), 193–205.
- Loomis, J., Brown, T., Lucero, B., & Peterson, G. (1996). Improving validity experiments of contingent valuation methods: Results of efforts to reduce the disparity of hypothetical and actual willingness to pay. *Land Economics*, 72(4), 450–461.
- Loomis, J., Brown, T., Lucero, B., & Peterson, G. (1997). Evaluating the validity of the dichotomous choice question format in contingent valuation. *Environmental & Resource Economics*, 10(2), 109–123.
- Miller, K. M., Hofstetter, R., Krohmer, H., & Zhang, Z. J. (2011). How should consumers' willingness to pay be measured? An Empirical Comparison of State-of-the-Art Approaches. *Journal of Marketing Research*, 48(1), 172–184.
- Moser, R., Raffaelli, R., & Notaro, S. (2014). Testing hypothetical bias with a real choice experiment using respondents' own money. *European Review of Agricultural Economics*, 41(1), 25–46.
- Murphy, J. J., Allen, P. G., Stevens, T. H., & Weatherhead, D. (2005). A meta-analysis of hypothetical bias in stated preference valuation. *Environmental & Resource Economics*, 30(3), 313–325.
- Murphy, J. J., Stevens, T. H., & Yadav, L. (2010). A comparison of induced value and home-grown value experiments to test for hypothetical bias in contingent valuation. *Environmental & Resource Economics*, 47(1), 111–123.
- Neill, H. R., Cummings, R. G., Ganderton, P. T., Harrison, G. W., & McGuckin, T. (1994). Hypothetical surveys and real economic commitments. *Land Economics*, 70(2), 145–154.
- Paradiso, M., & Trisorio, A. (2001). The effect of knowledge on the disparity between hypothetical and real willingness to pay. *Applied Economics*, 33(11), 1359–1364.
- Samuelson, P. A. (1954). The pure theory of public expenditure. *The Review of Economics and Statistics*, 36(4), 387–389.
- Sattler, H., & Nitschke, T. (2003). Ein empirischer Vergleich von Instrumenten zur Erhebung von Zahlungsbereitschaften. *Schmalenbachs Zeitschrift für betriebswirtschaftliche Forschung*, 55(4), 364–381.
- Schlag, N. (2008). *Validierung der Conjoint-Analyse zur Prognose von Preisreaktionen mithilfe realer Zahlungsbereitschaften*. Lohmar, Germany: Josef Eul Verlag.

- Schmidt, J. (2016). *An empirical comparison of direct survey methods for determining willingness-to-pay* (Master Thesis, Karlsruhe Institute of Technology, Germany).
- Schreier, M., & Werfer, J. (2007). Auktionen versus Lotterien: Ein empirischer Vergleich zur Messung von Zahlungsbereitschaften. *Die Betriebswirtschaft*, 67(1), 22–40.
- Schwaha, S. (2009). *Forecasting willingness-to-pay with direct price elicitation: The moderating role of consumer characteristics* (Master Thesis, University of Vienna, Austria). Retrieved from [http://othes.univie.ac.at/6411/1/2009-06-30\\_0317279.pdf](http://othes.univie.ac.at/6411/1/2009-06-30_0317279.pdf)
- Sichtmann, C., Wilken, R., & Diamantopoulos, A. (2011). Estimating willingness-to-pay with choice-based conjoint analysis: Can consumer characteristics explain variations in accuracy? *British Journal of Management*, 22(4), 628–645.
- Varian, H. R. (2010). *Intermediate microeconomics: A modern approach* (8<sup>th</sup> ed.). London, United Kingdom: W. W. Norton & Company.
- Völckner, F. (2006). An empirical comparison of methods for measuring consumers' willingness to pay. *Marketing Letters*, 17(2), 137–149.
- Wang, T., Venkatesh, R., & Chatterjee, R. (2007). Reservation price as a range: An incentive-compatible measurement approach. *Journal of Marketing Research*, 44(2), 200–213.
- Wertenbroch, K., & Skiera, B. (2002). Measuring consumers' willingness to pay at the point of purchase. *Journal of Marketing Research*, 39(2), 228–241.
- Wlömert, N., & Eggers, F. (2016). Predicting new service adoption with conjoint analysis: External validity of BDM-based incentive-aligned and dual-response choice designs. *Marketing Letters*, 27(1), 195–210.
- Yue, C., Hall, C. R., Behe, B. K., Campbell, B. L., Dennis, J. H., & Lopez, R. G. (2010). Are consumers willing to pay more for biodegradable containers than for plastic ones? Evidence from hypothetical conjoint analysis and nonhypothetical experimental auctions. *Journal of Agricultural and Applied Economics*, 42(4), 757–772.
- Zanger, V. (2018). *Measuring willingness to pay for innovations: Which method should be used in which context?* (Master Thesis, University of Muenster, Germany).
